1  
2 *Drosophila* Filamin exhibits a mechano-protective role during nephrocyte  
3 injury via induction of hypertrophic growth

4  
5 Sybille Koehler and Barry Denholm  
6  
7 Biomedical Sciences, University of Edinburgh, Edinburgh, Scotland, UK  
8

9 Corresponding author:

10  
11 Sybille Koehler  
12 Hugh Robson Building  
13 George Square  
14 EH89XD Edinburgh  
15 Scotland, UK  
16 [V1skoehl@ed.ac.uk](mailto:V1skoehl@ed.ac.uk)  
17

18  
19 **Abstract**

20 Podocytes are highly specialized epithelial cells of the kidney glomerulus and are an  
21 essential part of the filtration barrier. Due to their position and function in the kidney,  
22 they are exposed to constant biomechanical forces such as shear stress and  
23 hydrostatic pressure. These forces increase during disease, resulting in podocyte  
24 injury and loss. The mechanism by which biomechanical forces are sensed and  
25 transduced to elicit an adaptive and protective response remains largely unknown.  
26 Here we show, using the *Drosophila* nephrocyte model, that the mechanosensor  
27 Cheerio (dFilamin) is central to this ‘mechano-protective’ mechanism. We found  
28 expression of an activated mechanosensitive variant of Cheerio induced hypertrophy  
29 and rescued filtration function in injured nephrocytes. Additional analysis with human  
30 Filamin B confirmed this mechano-protective role. We delineated the mechano-  
31 protective pathway downstream of Cheerio and found activation of TOR and Yorkie  
32 induce nephrocyte hypertrophy, whereas their repression reversed the Cheerio-  
33 mediated hypertrophy. Although Cheerio/Filamin B pathway mediates a mechano-  
34 protective role in the face of injury, we found excessive activity resulted in a  
35 pathological phenotype, indicating activity levels must be tightly controlled. Taken  
36 together, our data suggest that Cheerio acts via the TOR and YAP pathway to induce  
37 hypertrophic growth, as a mechano-protective response to nephrocyte injury.

38

39

## 1 **Introduction**

2 Podocytes are highly specialized epithelial cells in the kidney glomerulus which  
3 together with fenestrated endothelial cells and the glomerular basement membrane  
4 (GBM) form the three-layered filtration barrier. The unique morphology of podocytes is  
5 exemplified by the formation of primary and secondary foot processes. These  
6 processes enwrap completely the glomerular capillaries and the adjacent foot  
7 processes of neighbouring podocytes interdigitate. This specialized arrangement  
8 facilitates the formation of a unique cell-cell-contact, the slit diaphragm (SD) (Arakawa,  
9 1970; Pavenstädt et al., 2003). Interestingly, the glomerular filtrate has the highest  
10 extravascular flow rate in the human body and depends on the hydrostatic pressure  
11 difference across the filtration barrier (Kriz and Lemley, 2017). Podocyte morphology  
12 and attachment to the GBM is crucial to counteract these forces of flow and pressure.

13 Due to their position and function in the glomerular filter, podocytes face  
14 continual and fluctuating biomechanical forces of different types such as tensile forces  
15 induced by hydrostatic pressure in the capillaries and fluid shear stress in the filtration  
16 slit as well as in the Bowman's space (Endlich et al., 2017). These biomechanical  
17 forces increase during diseases such as hypertension and diabetes, inflicting podocyte  
18 injury that result in changes to their morphology, detachment from the basement  
19 membrane and ultimately to their loss as they are shed into the primary urine. As post-  
20 mitotic cells, podocytes cannot be replenished, which leaves the capillaries blank and  
21 result in proteinuria, loss of protein from blood into urine. To avoid this, it is conceivable  
22 that podocytes possess mechanisms to monitor and adapt to fluctuations in  
23 biomechanical forces, which are up-regulated upon podocyte injury. Indeed, they  
24 contain a contractile actin-based cytoskeleton similar to that in smooth muscle cells  
25 suggesting their morphology is 'plastic' which might be an important component of the  
26 adaptive mechanisms required to withstand mechanical forces (Faul et al., 2007). This

1 actin-based cytoskeleton plays a crucial role in the development and maintenance of  
2 podocyte morphology.

3 In general, the process of transducing biomechanical force into biochemical  
4 signal is called mechanotransduction (Endlich et al., 2017). Mechanosensors—as they  
5 detect biomechanical force—are essential for this process. Several classes of  
6 mechanosensors such as ion channels, proteins associated with the actin-  
7 cytoskeleton and proteins of the extracellular matrix, are already known (Endlich et al.,  
8 2017). In fact, a few proteins were already described to have a mechanosensor  
9 function in podocytes. Among them are the ion channels TRPC6 and P2X4 (Anderson  
10 et al., 2013; Forst et al., 2016) as well as the actin-associated proteins Cofilin, Paxillin  
11 and Filamin (Endlich et al., 2001; Greiten et al., 2021; Hayakawa et al., 2011; Okabe  
12 et al., 2021; Smith et al., 2014). However, detailed investigations into the functional  
13 roles of the mechanosensors in podocytes are scarce. In addition, the question  
14 whether additional proteins exhibit a mechanosensor function in podocytes remains  
15 unknown.

16 We and others have found the mechanosensor Filamin B to be upregulated  
17 upon podocyte injury in mice and in patient-derived glomerular tissue (Greiten et al.,  
18 2021; Koehler et al., 2020; Okabe et al., 2021). It is not known if this upregulation is a  
19 protective mechanism or induced as part of the pathological injury. Moreover, the  
20 functional role of Filamin B in podocytes remains largely unknown until today, as a  
21 global loss of Filamin causes embryonic (E14.5) or postnatal (directly after birth)  
22 lethality (Dalkilic et al., 2006; Feng et al., 2006; Hart et al., 2006; Zhou et al., 2010).  
23 Filamins are evolutionarily highly conserved, containing a N-terminal actin-binding  
24 domain and 24  $\beta$ -sheet Ig domains, of which domain 16 to 24 contribute to the  
25 mechanosensor region (Razinia et al., 2012) (**Supp Figure 1A**). Vertebrates have

1 three Filamins (Filamin A, B and C), whereas the *Drosophila* and *C. elegans* genomes  
2 encode a single Filamin (Cheerio and FLN-1 respectively) (Razinia et al., 2012).

3 Here, we used the *Drosophila* nephrocyte model to unravel the functional role  
4 of Filamin B and to specifically address whether Filamin B has a mechano-protective  
5 role upon nephrocyte injury.

6

## 7 **Material and Methods**

8 **Table 1: List of antibodies**

| Name    | Company/ Provider                    | Catalog nr. / Reference         | Host Species | Dilution IF |
|---------|--------------------------------------|---------------------------------|--------------|-------------|
| Cher    | M. Uhlirova                          | (Külshammer and Uhlirova, 2013) | Rat          | 1:100       |
| Duf     | M. Ruiz-Gomez                        | (Weavers et al., 2009)          | Rabbit       | 1:100       |
| GFP     | Abcam                                | ab6673                          | Goat         | 1:200       |
| HA tag  | Proteintech                          | 51064-2-AP                      | Rabbit       | 1:100       |
| Pyd     | Developmental Studies Hybridoma Bank | PYD2                            | Mouse        | 1:25        |
| Albumin | Abcam                                | ab207327                        | Rabbit       | 1:25        |

9

10

11

12

13

14

1 **Table 2: List of fly strains**

| <b>Fly strain</b>                   | <b>Origin</b>                             | <b>Purpose</b>             | <b>Chromosome</b> |
|-------------------------------------|-------------------------------------------|----------------------------|-------------------|
| Cher-GFP-Trap                       | BDSC ID: 60261                            | Expression pattern         | 3. Chr.           |
| UAS-Cher WT MSR                     | J. Ylänne (Huelsmann et al., 2016)        | Overexpression             | 3. Chr.           |
| UAS-Cher inactive MSR (Cher closed) | J. Ylänne (Huelsmann et al., 2016)        | Overexpression             | 3. Chr.           |
| UAS-Cher active MSR (Cher open)     | J. Ylänne (Huelsmann et al., 2016)        | Overexpression             | 3. Chr.           |
| UAS-Sns-RNAi                        | VDRC ID: 109442                           | Knockdown                  | 2. Chr.           |
| UAS-Duf-RNAi                        | VDRC ID: 27227                            | Knockdown                  | 2. Chr.           |
| Sns-Gal4; UAS-Dicer2                | Selfmade                                  | Nephrocyte-specific driver | 2. + 3. Chr.      |
| UAS-human Filamin B WT              | Selfmade/transgenics made by Genetivision | Overexpression             | 3. Chr.           |
| UAS- human Filamin B delta ACB      | Selfmade/transgenics made by Genetivision | Overexpression             | 3. Chr.           |
| UAS-human Filamin B delta MSR       | Selfmade/transgenics made by Genetivision | Overexpression             | 3. Chr.           |
| UAS-TOR-WT                          | BDSC ID: 7012                             | Overexpression             | 3. Chr.           |
| UAS-TOR-DN                          | BDSC ID: 7013                             | Overexpression             | 2. Chr.           |

|                                                       |                   |                |              |
|-------------------------------------------------------|-------------------|----------------|--------------|
| UAS-Rheb;UAS-TOR-WT<br>(TOR-OA)                       | BDSC ID:<br>80932 | Overexpression | 2. + 3. Chr. |
| UAS-arm.S10 ( $\beta$ -catenin<br>OA)                 | BDSC ID:4785      | Overexpression | X Chr.       |
| UAS-pan.dTCFdeltaN (WNT<br>repressor)                 | BDSC ID:4784      | Overexpression | 2. Chr.      |
| UAS-<br>yki.S111A.S168A.S250A.V5<br>(YAP hyperactive) | BDSC ID:28817     | Overexpression | 3. Chr.      |
| UAS-Hippo(dMST).Flag                                  | BDSC ID:44254     | Overexpression | 3. Chr.      |
| Oregon R                                              |                   | wildtype       |              |
| W <sup>1118</sup>                                     |                   | wildtype       |              |

1

## 2 Fly husbandry and generation

3 All flies were kept at 25°C for experiments. The nephrocyte-specific expression was  
4 achieved by mating UAS fly strains to the Sns-Gal4 strain.

5 Human Filamin B isoforms were amplified from a human embryonic kidney cDNA  
6 library using the following primers:

7 hFilamin B WT (full length):

8 fwd: 5'-CGCGGGACGCGTACCATGCCGGTAACCG -3'

9 rev: 5'-ATGCACGCGGCCGCTTAAGGCACTGTGAC- 3'

10

11 hFilamin B delta actin binding domain (ACB) (lacking bps 6 – 717):

12 fwd: 5'-CGCGGGACGCGTACC ATGCCGGCCAAGC- 3'

13 rev : 5'-ATGCACGCGGCCGCTTAAGGCACTGTGAC- 3'

14

15 hFilamin B delta mechanosensor region (MSR) (truncation after 5445 bps):

16 fwd: 5'-CGCGGGACGCGTACCATGCCGGTAACCG -3'

17 rev: 5'-ATGCACGCGGCCGCTTATAGAACTGG – 3'

1 hFilamin B constructs were cloned into the pUAST vector with a C-terminal HA tag.

2

### 3 **Immunofluorescences of *Drosophila* tissue**

4 *Drosophila* embryos were collected over 24 hrs and dechorionated in 50% bleach for  
5 10 min. Following a washing step with H<sub>2</sub>O, they were fixed in 4%  
6 Formaldehyde/Heptane for 20 min. Heptane was then removed and replaced by  
7 Methanol, vortexed for 30 sec to devitellinized. The two phases separated after a  
8 minute and the embryos remained in the lower Formaldehyde phase. Both phases  
9 were removed and the embryos were washed with Methanol x3 for 20 min. The  
10 embryos were then washed with washing buffer (phosphate-buffered saline with 0.5 %  
11 BSA and 0.3 % Triton-X, PBS-Tx-BSA) x3 for 20 min, followed by overnight incubation  
12 at 4°C in primary antibody (see table 1). Primary antibody was removed from embryos  
13 and non-specific antibody binding was removed with 3x washes in PBS-Tx-BSA, the  
14 embryos were blocked in PBS-Tx-BSA + 5 % normal horse serum for 30 min, and then  
15 incubated with the appropriate secondary antibody for 1 h at room temperature (see  
16 table 1). Embryos were washed 3x 10 min in PBS-Tx-BSA before mounting in  
17 mounting medium (2.5% propyl gallate and 85% glycerol).

18 Garland nephrocytes were prepared by dissecting a preparation containing the  
19 oesophagus and proventriculus (to which the garland nephrocytes are attached) from  
20 3<sup>rd</sup> instar larvae in haemolymph like buffer (HL3.1; 70 mM NaCl, 5 mM KCl, 1.5 mM  
21 CaCl<sub>2</sub>, 4 mM MgCl<sub>2</sub>, 10 mM NaHCO<sub>3</sub>, 115 mM Sucrose and 5 mM Hepes). The cells  
22 were fixed in 4 % Formaldehyde for 20 min, followed by three washing steps with PBS-  
23 Tx-BSA for 20 min. Incubation in primary antibody was at 4°C overnight. The next day,  
24 the preparation was washed x3 for 20 min, blocked with 5 % normal horse serum (in  
25 PBS-Tx-BSA) for 30 min, followed by incubation in the appropriate secondary antibody

1 for 1 h at room temperature. The preparation was washed x3 for 20 min, before  
2 mounting in mounting medium.

3 Imaging was carried out using either a Zeiss LSM 800 confocal or a Leica SP8  
4 confocal. Images were further processed using ImageJ (version 1.53c).

5

## 6 **FITC-Albumin assay**

7 FITC-Albumin uptake assays were performed as previously published (Hermle et al.,  
8 2017; Koehler et al., 2020). Garland nephrocytes were prepared as described above  
9 and incubated with FITC-Albumin (0.2 mg/ml; Sigma-Aldrich, St. Louis, USA) for 1 min,  
10 followed by 20 min fixation with 4 % Formaldehyde. Nephrocytes isolated from Cheerio  
11 overexpression flies were used for additional antibody staining against Albumin (Cy3-  
12 labelled secondary antibody), as they express GFP. Antibody based staining was  
13 performed as previously described. For comparative analysis, the exposure time of  
14 experiments was kept identical. The mean intensity of FITC-Albumin or the Cy3-  
15 labelled FITC-Albumin was measured and normalized to control cells. Images were  
16 also used to quantify nephrocyte size by measuring the area of each cell.

17

## 18 **AgNO<sub>3</sub> toxin assay**

19 Flies of the appropriate genotype were allowed to lay eggs for 24 hrs at 25°C on juice  
20 plates with yeast. Plates with eggs were incubated at 18°C for 24 hrs. A defined  
21 number of 1<sup>st</sup> instar larvae (usually 20) were then transferred to juice plates  
22 supplemented with yeast paste containing AgNO<sub>3</sub> (2 g yeast in 3.5 ml 0.003% AgNO<sub>3</sub>).  
23 Plates were kept at 25°C for 4 days to let larvae develop and pupate. The number of  
24 pupae was counted daily between days 5-9 after egg laying and percentage pupation  
25 (relative to the number of larvae added to plate) was calculated.

26



## 1 **Statistical analysis**

2 To determine statistical significance Graph Pad Prism software version 8 for Mac  
3 (GraphPad Software, San Diego, CA) was used. All results are expressed as means  
4  $\pm$  SEM. Comparison of more than two groups with one independent variable was  
5 carried out using one-way ANOVA followed by Tukey's multiple comparisons test. A  
6 *P-value* < 0.05 was considered statistically significant.

7

## 8 **Results**

### 9 **Cheerio is expressed in nephrocytes and co-localizes with the nephrocyte** 10 **diaphragm proteins Duf and Pyd**

11 Previous studies showed Filamin B levels to be elevated in patients suffering  
12 from focal segmental glomerulosclerosis (FSGS) and in injured murine podocytes, but  
13 its functional role and whether the increased expression levels are protective or  
14 pathogenic, remain elusive (Koehler et al., 2020; Okabe et al., 2021). Hence, within  
15 this study, we investigated the functional role of the *Drosophila* Filamin homologue,  
16 Cheerio, in more detail. To do so, we used the nephrocyte model, which shows a high  
17 morphological and functional similarity with mammalian podocytes and is widely used  
18 as a model for podocytes (Hermle et al., 2017; Koehler et al., 2020; Weavers et al.,  
19 2009).

20 We found that Cheerio is expressed from late embryonic stages and maintained  
21 throughout the life cycle in *Drosophila* garland nephrocytes. Interestingly, it partly co-  
22 localized with the nephrocyte diaphragm protein Dumbfounded (Duf/dNeph)  
23 suggesting it is present at the nephrocyte diaphragm and might be part of the  
24 nephrocyte diaphragm multi-protein complex (**Figure 1A,B**). Based on its expression  
25 in nephrocytes and subcellular localization to the nephrocyte diaphragm we reasoned  
26 that the nephrocyte would be an excellent system to model Cheerio/Filamin B function.

## 1 **Elevated active Cheerio levels resulted in nephrocyte hypertrophy**

2  $\beta$ 1-Integrin, a transmembrane protein that forms part of the extracellular matrix,  
3 is crucial for mechanotransduction. Both Filamin and Cheerio are able to bind  $\beta$ 1-  
4 Integrin and the actin cytoskeleton. Filamin/Cheerio therefore provide a functional link  
5 between the extracellular matrix and the actin-cytoskeleton and allow extracellular  
6 force to be transduced into the cell (Razinia et al., 2012). The interaction with  $\beta$ 1-  
7 Integrin is mediated by a force induce conformational change of Filamin, which results  
8 in access to domain 21 (Filamin) (Sutherland-Smith, 2011). To investigate the  
9 functional role of Cheerio and to mimic the elevated Filamin B levels observed upon  
10 podocyte injury, we assayed three different Cheerio variants in nephrocytes  
11 (Huelsmann et al., 2016) (**Supp. Figure 1A**). Here, we focused on the functional role  
12 of the mechanosensor region (MSR). In addition to the wildtype MSR (Cher wildtype),  
13 we used a 'closed' variant which requires greater mechanical force to unmask the  
14 binding sites for downstream targets of Cheerio, between domains 15/16 and 17 /18,  
15 and is therefore less active (Cher Inactive) (Huelsmann et al., 2016; Nakamura et al.,  
16 2006). In addition, we used an 'open' variant which requires less mechanical force to  
17 unmask the interaction sites of downstream targets and is therefore more active (Cher  
18 Active). The mutations introduced into Cheerio to generate the active variant were  
19 reported to cause an enhanced integrin binding (Lad et al., 2007).

20 To unravel the functional role of Cheerio-MSR, we expressed the Cheerio  
21 variants with a nephrocyte-specific driver (Sns-Gal4). We first analysed the subcellular  
22 expression pattern of each variant using the C-terminal GFP tag. Cher wildtype and  
23 Cher Inactive were localized throughout the nephrocyte cytoplasm. In contrast, Cher  
24 Active accumulated predominantly at the nephrocyte periphery, indicative of  
25 localization at the nephrocyte diaphragm (**Figure 1C**).

1           Upon expression of the different Cheerio variants nephrocyte diaphragm  
2 integrity and morphology were not changed (**Figure 1D,E**). In contrast, nephrocyte size  
3 increased significantly when expressing Cher Active, but not Cher wildtype or Cher  
4 Inactive (**Figure 1F**). We also analysed nephrocyte function. The normal function of  
5 nephrocytes is to remove toxins from the haemolymph by filtration and endocytosis;  
6 processes which require an intact and functional nephrocyte diaphragm (Weavers et  
7 al., 2009). These processes can be assayed by (i) measuring FITC-Albumin uptake in  
8 isolated nephrocytes and (ii) monitoring the ability of nephrocytes to clear ingested  
9 AgNO<sub>3</sub> (a toxin) from the haemolymph in the intact animal (haemolymph borne AgNO<sub>3</sub>  
10 reduces viability and slows development, therefore haemolymph AgNO<sub>3</sub> concentration  
11 can be assessed indirectly by its impact on these parameters). We used both assays  
12 to determine the effects of Cheerio variants on nephrocyte function (**Figure 1G,H**). No  
13 defects were found for any of the variants in the FITC-Albumin uptake assay (**Figure**  
14 **1G, Supp. Figure 1B**). In line with this, we could not detect any significant delay in  
15 pupation behaviour for the different Cheerio variants in comparison to control flies  
16 (**Figure 1H**). When we compared the pupation behaviour of the different genotypes  
17 fed on AgNO<sub>3</sub> with animals fed on normal yeast we also could not detect any  
18 differences (**Figure 1I**). In summary, the expression of active Cheerio did not result in  
19 a pathological phenotype (i.e. there was no impact on nephrocyte morphology or  
20 filtration function), but stimulated growth of the nephrocyte. This, along with the fact  
21 that hypertrophic growth is a protective mechanism during podocyte injury (Kriz and  
22 Lemley, 2015), suggest increased Cheerio/Filamin activity levels is a protective rather  
23 than pathogenic response.

24

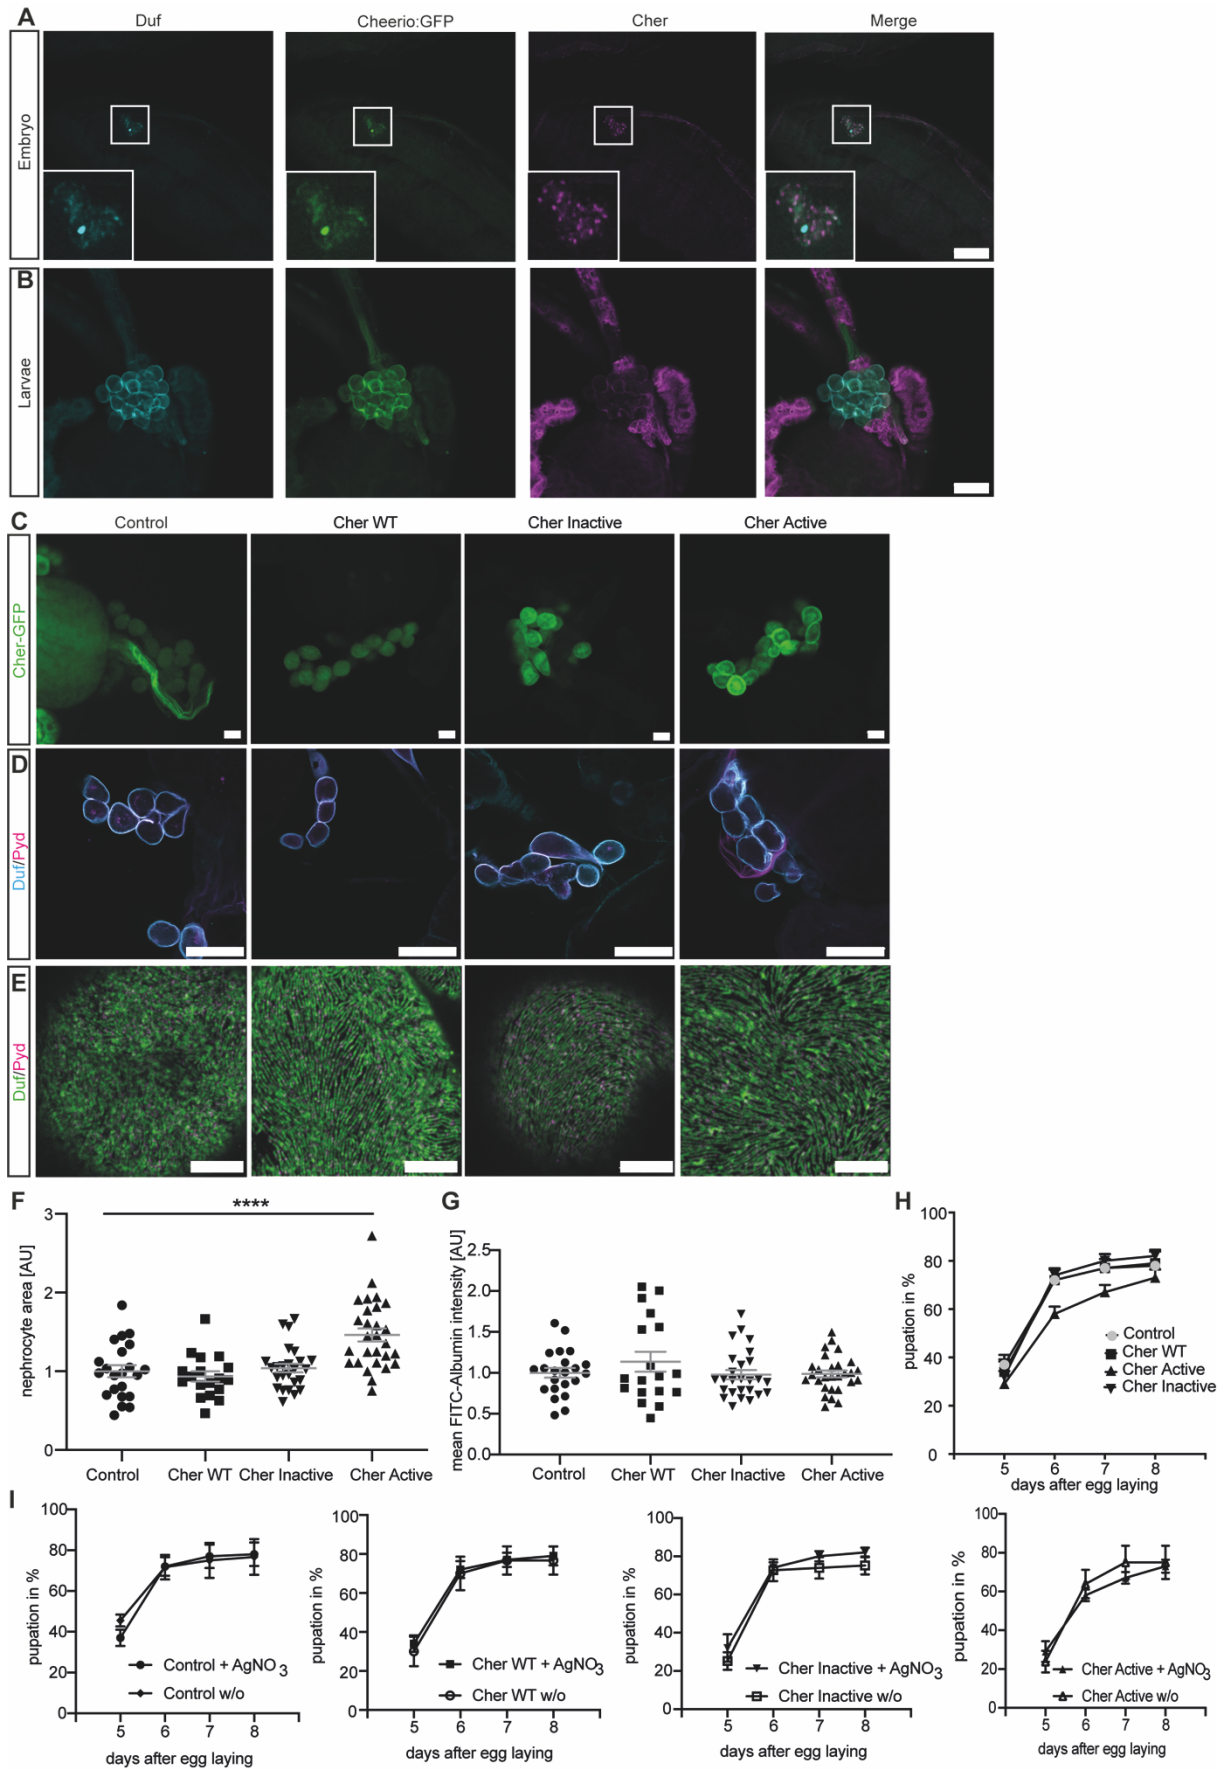

1

2

1 **Figure 1: Elevated Cheerio-MSR levels result in nephrocyte hypertrophy.** **A,B** Immunofluorescence  
 2 staining confirmed the expression of Cheerio (green: Cheerio:GFP; magenta: anti-Cheerio antibody) in  
 3 *Drosophila* wildtype embryos (**A**) and garland nephrocytes isolated from 3<sup>rd</sup> instar larvae (**B**). Co-staining  
 4 with a Duf antibody (cyan) revealed partial co-localisation with Cheerio. Scale bar = 50  $\mu\text{m}$  (**A**) and 25  
 5  $\mu\text{m}$  (**B**). **C** Cheerio mutants were expressed specifically in nephrocytes and are fused to a C-terminal  
 6 GFP. Confocal microscopy revealed a cytoplasmic localization of wildtype (WT) and inactive Cheerio  
 7 (Cher), while the active variant shows an accumulation at the cell cortex. Scale bar = 25  $\mu\text{m}$ . Control:  
 8 *w;sns-Gal4;UAS-dicer2*, Cher wildtype: *w;sns-Gal4/UAS-cher-wildtype-MSR;UAS-dicer2/+*, Cher  
 9 Inactive: *w;sns-Gal4/+;UAS-dicer2/UAS-cher-inactive-MSR*, Cher Active: *w;sns-Gal4/+;UAS-*  
 10 *dicer2/UAS-cher-active-MSR*. **D** Duf and Pyd stainings did not show any changes in morphology after  
 11 expressing the Cheerio variants. Scale bar = 25  $\mu\text{m}$  **E** Also, high resolution imaging using Airyscan and  
 12 confocal microscopy did not reveal any differences when compared to control cells (*w;sns-Gal4;UAS-*  
 13 *dicer2*). Scale bar = 5  $\mu\text{m}$ . **F** Measuring nephrocyte size resulted in a significant size increase in  
 14 nephrocytes expressing the active Cheerio variant relative to control cells. One-way ANOVA plus  
 15 Tukey's multiple comparisons test: \*\*\*\*:  $p < 0.001$ . **G** FITC-Albumin uptake assays did not reveal any  
 16 differences. **H, I** The AgNO<sub>3</sub> toxin assay showed a slightly delayed pupation in flies expressing the active  
 17 Cheerio variant in nephrocytes, however this difference was not significant.  
 18

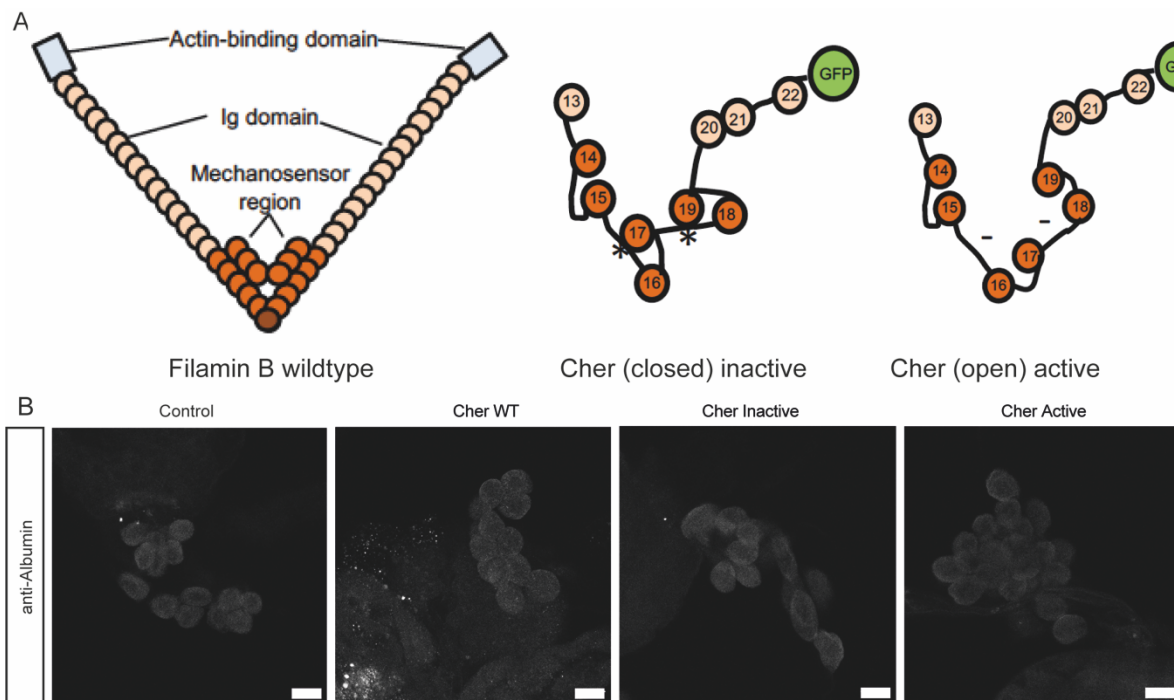

19  
 20  
 21 **Supp. Figure 1: Cheerio variants.** **A** Schematics showing the human Filamin B wildtype with its actin-  
 22 binding domain (light blue), the IgG domains (light orange) and the mechanosensor region (orange).  
 23 The Cheerio variants used within this study were generated by replacing the sequences between  
 24 domain 15 and 16 as well as 17 and 18 (represented by asterisk and hyphen). Modified from Huelsmann  
 25 et al. (Huelsmann et al., 2016) **B** FITC-Albumin assays did not reveal any differences between control  
 26 and Cheerio expressing nephrocytes. Due to the GFP-tag FITC-Albumin was visualized by using an  
 27 Albumin antibody. Scale bar = 25  $\mu\text{m}$ . Control: *w;sns-Gal4;UAS-dicer2*, Cher wildtype: *w;sns-Gal4/UAS-*  
 28 *cher-wildtype-MSR;UAS-dicer2/+*, Cher Inactive: *w;sns-Gal4/+;UAS-dicer2/UAS-cher-inactive-MSR*,  
 29 Cher Active: *w;sns-Gal4/+;UAS-dicer2/UAS-cher-active-MSR*.  
 30  
 31  
 32  
 33  
 34

## 1 **Cheerio exhibits a protective role during nephrocyte injury**

2 We next investigated whether Cheerio exhibits a similar protective role upon  
3 nephrocyte injury. Loss of either of the nephrocyte diaphragm components Sns  
4 (dNephrin) or Duf resulted in a severe nephrocyte injury that includes both  
5 morphological and functional disturbances (Weavers et al., 2009; Zhuang et al., 2009).  
6 In detail, nephrocyte diaphragm integrity was severely disrupted and cell size reduced,  
7 while FITC-Albumin uptake is significantly decreased and the onset of pupal  
8 development is severely delayed in the AgNO<sub>3</sub> toxin uptake assay. In line with our  
9 hypothesis that Cheerio provides a protective role, we found that endogenous Cheerio  
10 translocated from the cytoplasm to the nephrocyte cortex upon Sns or Duf depletion  
11 **(Figure 2A, arrowheads)**.

12 To assess if Cheerio has a beneficial effect during injury, we induced injury (by  
13 depleting Sns or Duf) whilst simultaneously expressing the active or inactive Cheerio-  
14 MSR variants **(Figure 2, Supp Figure 2,3)**. Filtration function was restored as shown  
15 with the FITC Albumin uptake assays **(Figure 2D, Supp. Figure 3B)**, but nephrocyte  
16 morphology and size could not be rescued by expressing the active Cheerio **(Figure**  
17 **3B,C)**. Active Cheerio also rescued the delayed pupation behaviour observed when  
18 depleting Duf **(Figure 2E,F)**. Expression of inactive Cheerio only resulted in a rescue  
19 of the delayed pupation in nephrocytes lacking Duf **(Supp. Figure 2A,B,C,D,E, Supp.**  
20 **Figure 3A)**.

21 The inactive variant translocated to and accumulated at the cell cortex during  
22 nephrocyte injury, suggesting an activation of Cheerio and its accumulation at the  
23 periphery during injury **(Supp Figure 2A)**. These data confirm a protective role of  
24 Cheerio-MSR during injury.

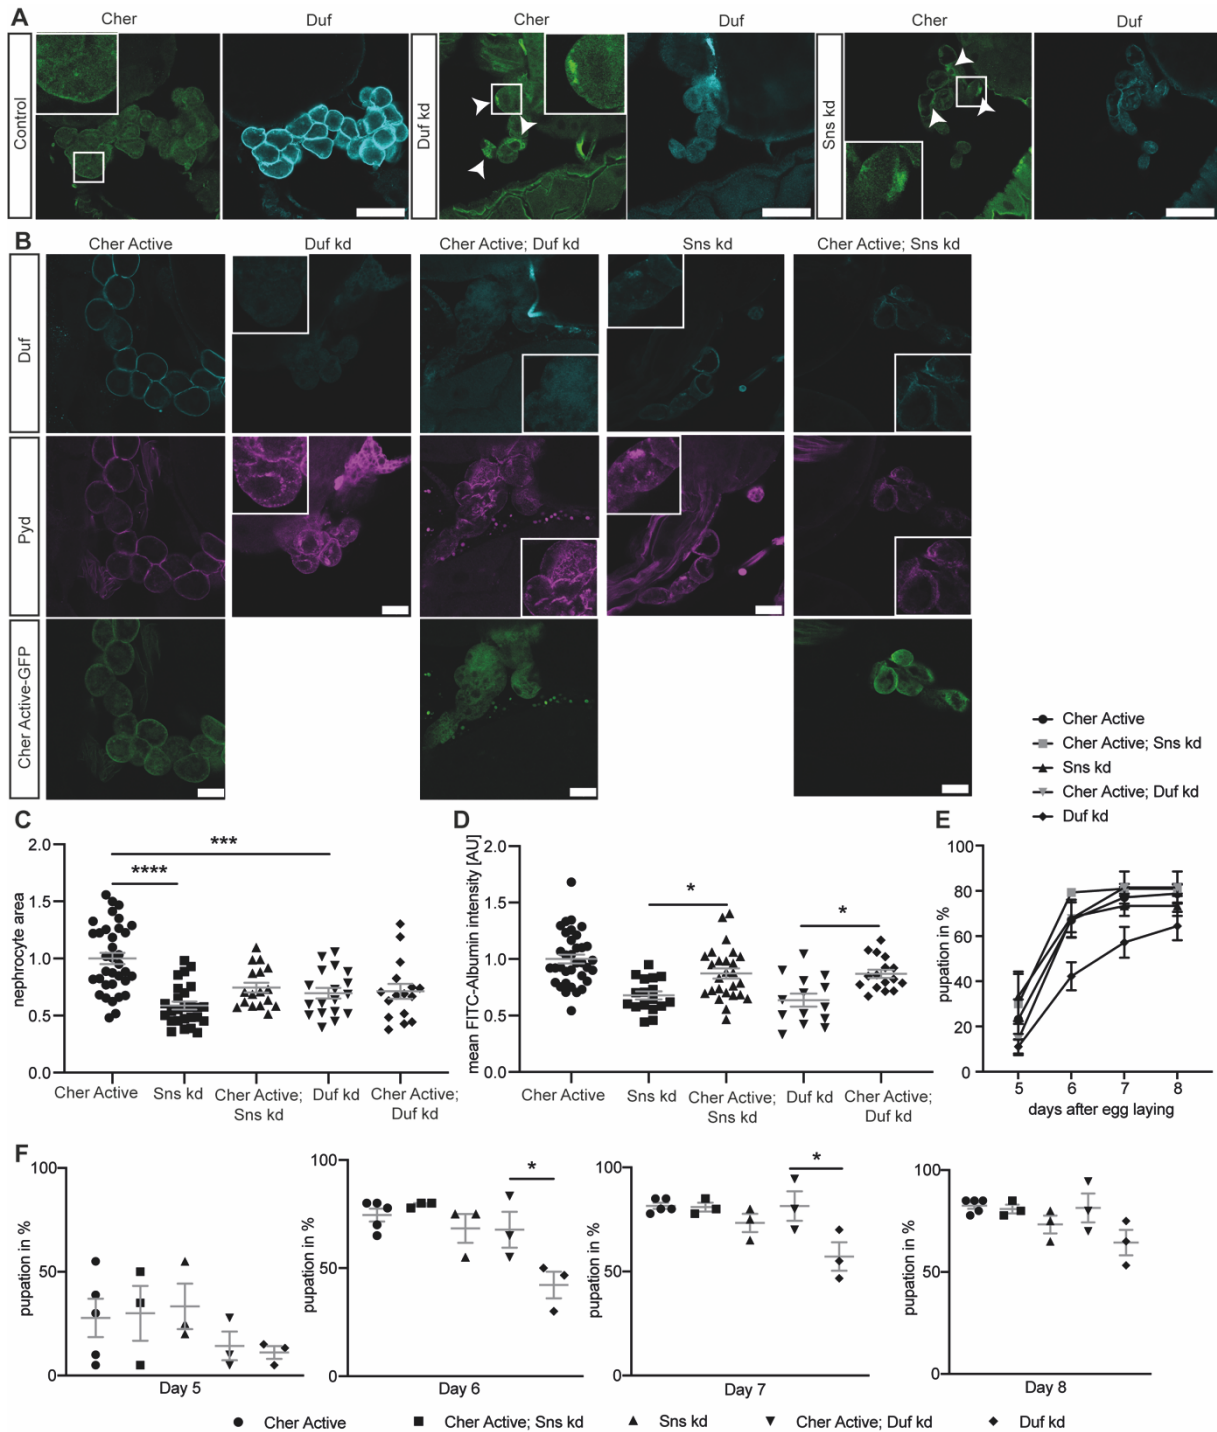

1  
2 **Figure 2: Active cherrio partially rescues the nephrocyte phenotype during injury.** **A** Cherrio  
3 localisation was examined in injured nephrocytes. By depleting Duf and Sns, nephrocytes present with  
4 a severe morphological phenotype, as Duf expression and localisation is severely disrupted (cyan).  
5 Comparing Cherrio expression and localisation to control cells revealed an accumulation of Cherrio at  
6 the cell cortex in injured cells. Scale bar = 50  $\mu$ m. **B** Active Cherrio was combined with Duf or Sns RNAi  
7 and showed no rescue of the nephrocyte morphology as depicted by Duf (cyan) and Pyd (magenta)  
8 staining. Scale bar = 25  $\mu$ m. Cher active: *w;sns-Gal4/+;UAS-cher-active-MSR/+*, Duf kd: *w;sns-*  
9 *Gal4/UAS-duf-RNAi;UAS-dicer2/+*; Cher active; Duf kd: *w;sns-Gal4/UAS-duf-RNAi;UAS-cher-active-*  
10 *MSR/+*, Sns kd: *w;sns-Gal4/UAS-sns-RNAi;UAS-dicer2/+*; Cher active; Sns kd: *w;sns-Gal4/UAS-sns-*  
11 *RNAi;UAS-cher-active-MSR/+*. **C** Nephrocyte size could not be rescued by simultaneous expression of  
12 active Cherrio and Duf or Sns RNAi. Cher Active was used as control and all other genotypes are  
13 depicted as relative values of Cher Active. **D** FITC-Albumin uptake was restored in both, Duf and Sns  
14 depleted nephrocytes after expression of active Cherrio. One-way ANOVA plus Tukey's multiple

1 comparisons test: \*\*\*:  $p < 0.001$ . **E,F** The AgNO<sub>3</sub> toxin assay revealed a rescue of the delayed pupation  
 2 by expressing active Cheerio in combination with Duf or Sns RNAi. One-way ANOVA plus Tukey's  
 3 multiple comparisons test: \*:  $p < 0.05$ .  
 4

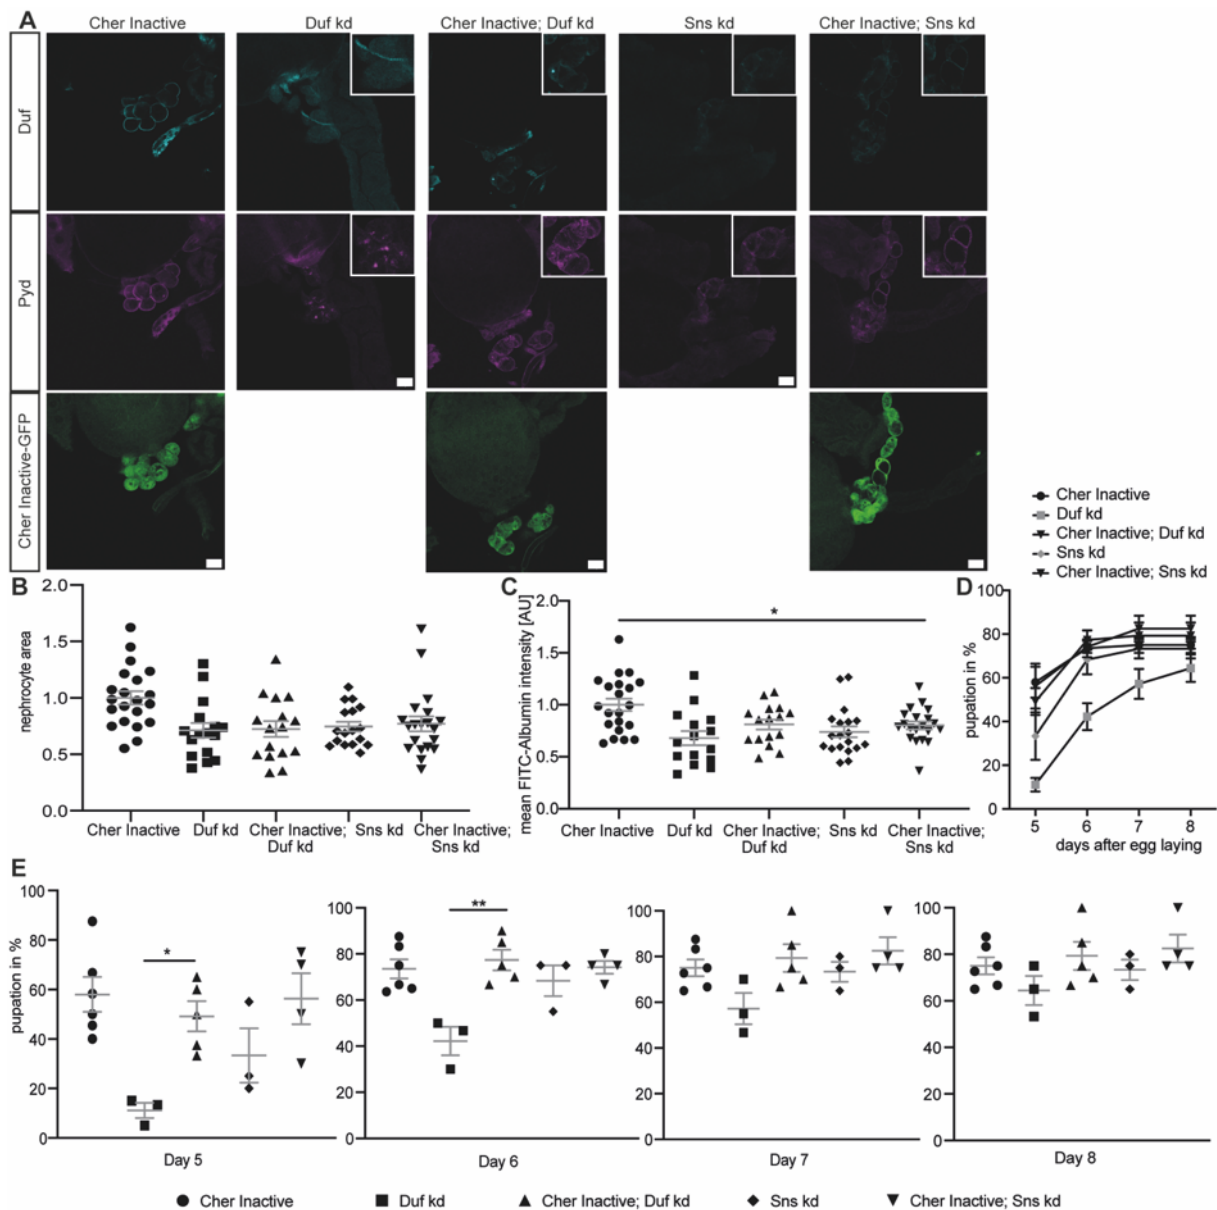

5  
 6 **Supp. Figure 2: Inactive Cheerio partially restores filtration function during injury.** **A** Inactive  
 7 Cheerio MSR was combined with Duf or Sns RNAi and revealed no restoration of the nephrocyte  
 8 diaphragm integrity, when compared to Duf or Sns knockdown. Scale bar = 25  $\mu$ m. Cher inactive: *w;sns-*  
 9 *Gal4/+;UAS-cher-inactive-MSR/+*, Duf kd: *w;sns-Gal4/UAS-duf-RNAi;UAS-dicer2/+*; Cher inactive; Duf  
 10 kd: *w;sns-Gal4/UAS-duf-RNAi;UAS-cher-inactive-MSR/+*, Sns kd: *w;sns-Gal4/UAS-sns-RNAi;UAS-*  
 11 *dicer2/+*; Cher inactive; Sns kd: *w;sns-Gal4/UAS-sns-RNAi;UAS-cher-inactive-MSR/+*. **B** Measuring  
 12 nephrocyte size did not reveal a rescue in cells expressing the inactive Cheerio together with the Sns  
 13 and Duf RNAi. Cher Inactive was used as control and all genotypes are depicted relative to Cher  
 14 Inactive. **C** FITC-Albumin assays also did not show a rescue for both genotypes, inactive Cheerio  
 15 combined with Duf or Sns RNAi. One-way ANOVA plus Tukey's multiple comparisons test: \*:  $p < 0.05$ .  
 16 **D,E** The AgNO<sub>3</sub> toxin assay however showed a significant rescue of the delayed pupation by expressing  
 17 the inactive Cheerio MSR in a Duf knockdown background. One-way ANOVA plus Tukey's multiple  
 18 comparisons test: \*:  $p < 0.05$ ; \*\*:  $p < 0.01$ .  
 19  
 20



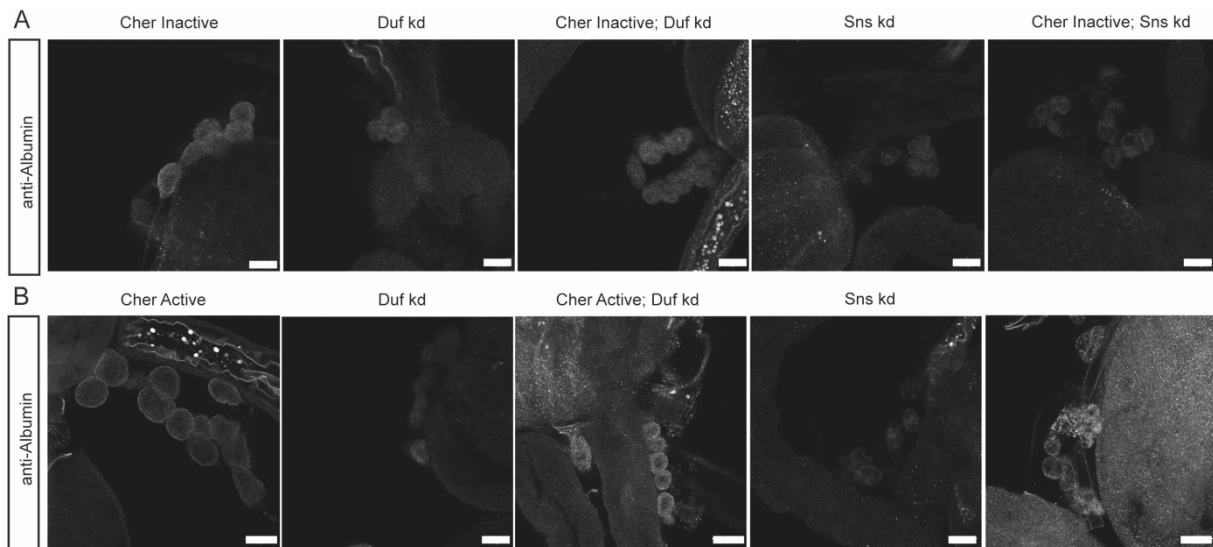

1  
2  
3  
4  
5  
6  
7  
8  
9  
10  
11  
12  
13  
14

**Supp. Figure 3: FITC-Albumin uptake assays of Cheerio rescue strains. A** Expression of inactive Cheerio in a Duf or Sns knockdown background did not rescue the FITC-Albumin uptake. Scale bar = 25  $\mu$ m. Cher inactive: *w;sns-Gal4/+;UAS-cher-inactive-MSR/+*, Duf kd: *w;sns-Gal4/UAS-duf-RNAi;UAS-dicer2/+*; Cher inactive; Duf kd: *w;sns-Gal4/UAS-duf-RNAi;UAS-cher-inactive-MSR/+*, Sns kd: *w;sns-Gal4/UAS-sns-RNAi;UAS-dicer2/+*; Cher inactive; Sns kd: *w;sns-Gal4/UAS-sns-RNAi;UAS-cher-inactive-MSR/+*. **B** Expression of active Cheerio in a Duf or Sns knockdown background partially restored the FITC-Albumin uptake. Scale bar = 25  $\mu$ m. Cher active: *w;sns-Gal4/+;UAS-cher-active-MSR/+*, Duf kd: *w;sns-Gal4/UAS-duf-RNAi;UAS-dicer2/+*; Cher active; Duf kd: *w;sns-Gal4/UAS-duf-RNAi;UAS-cher-active-MSR/+*, Sns kd: *w;sns-Gal4/UAS-sns-RNAi;UAS-dicer2/+*; Cher active; Sns kd: *w;sns-Gal4/UAS-sns-RNAi;UAS-cher-active-MSR/+*.

## 15 Human Filamin B has a mechano-protective role during nephrocyte injury

16 The wildtype human Filamin B (hFilB WT) displays a high sequence identity with  
17 Cheerio within the actin-binding domain (ACB, 68%) and MSR (52%) (**Figure 3A**).  
18 Hence, we generated flies expressing wildtype human Filamin B in nephrocytes  
19 exclusively. We first checked subcellular localization of Filamin B in nephrocytes and  
20 find it localized to the nephrocyte diaphragm (**Supp. Figure 4A**). Interestingly, in  
21 contrast to Cheerio, expression of Filamin B did not result in hypertrophy, but caused  
22 a significantly increased FITC-Albumin uptake (**Supp. Figure 4A**).

23 To investigate whether the protective role we have found for Cheerio is  
24 conserved for Filamin B, we generated transgenic flies in which Sns or Duf were  
25 depleted whilst simultaneously expressing human Filamin B.

1           We found a significant rescue of the nephrocyte size by simultaneous  
2 expression of human Filamin B wildtype, while morphology was partially restored  
3 **(Figure 3B,C)**. The onset of pupal development in the AgNO<sub>3</sub> toxin assay was  
4 significantly reinstated in Duf depleted cells, validating a protective role of Filamin B  
5 during nephrocyte injury, although there was no rescue of the FITC Albumin uptake  
6 **(Figure 3E,F)**. In summary, neither Cheerio nor human Filamin B could restore  
7 morphology. The reduced cell size after Duf and Sns depletion could only be rescued  
8 by human Filamin B and not by Cheerio. Of note, the Cheerio constructs used do not  
9 possess the ACB, which could account for this functional difference. The functional  
10 assays revealed a significant rescue of the FITC-Albumin uptake phenotype when  
11 expressing Cheerio and a significant rescue of the delayed pupation behaviour when  
12 expressing either Cheerio or human Filamin B together with Duf depletion.

13           Taken together, these data indicate that human Filamin B exhibits a level of  
14 protection upon nephrocyte injury, although the phenotypes that are rescued are  
15 different to Cheerio.

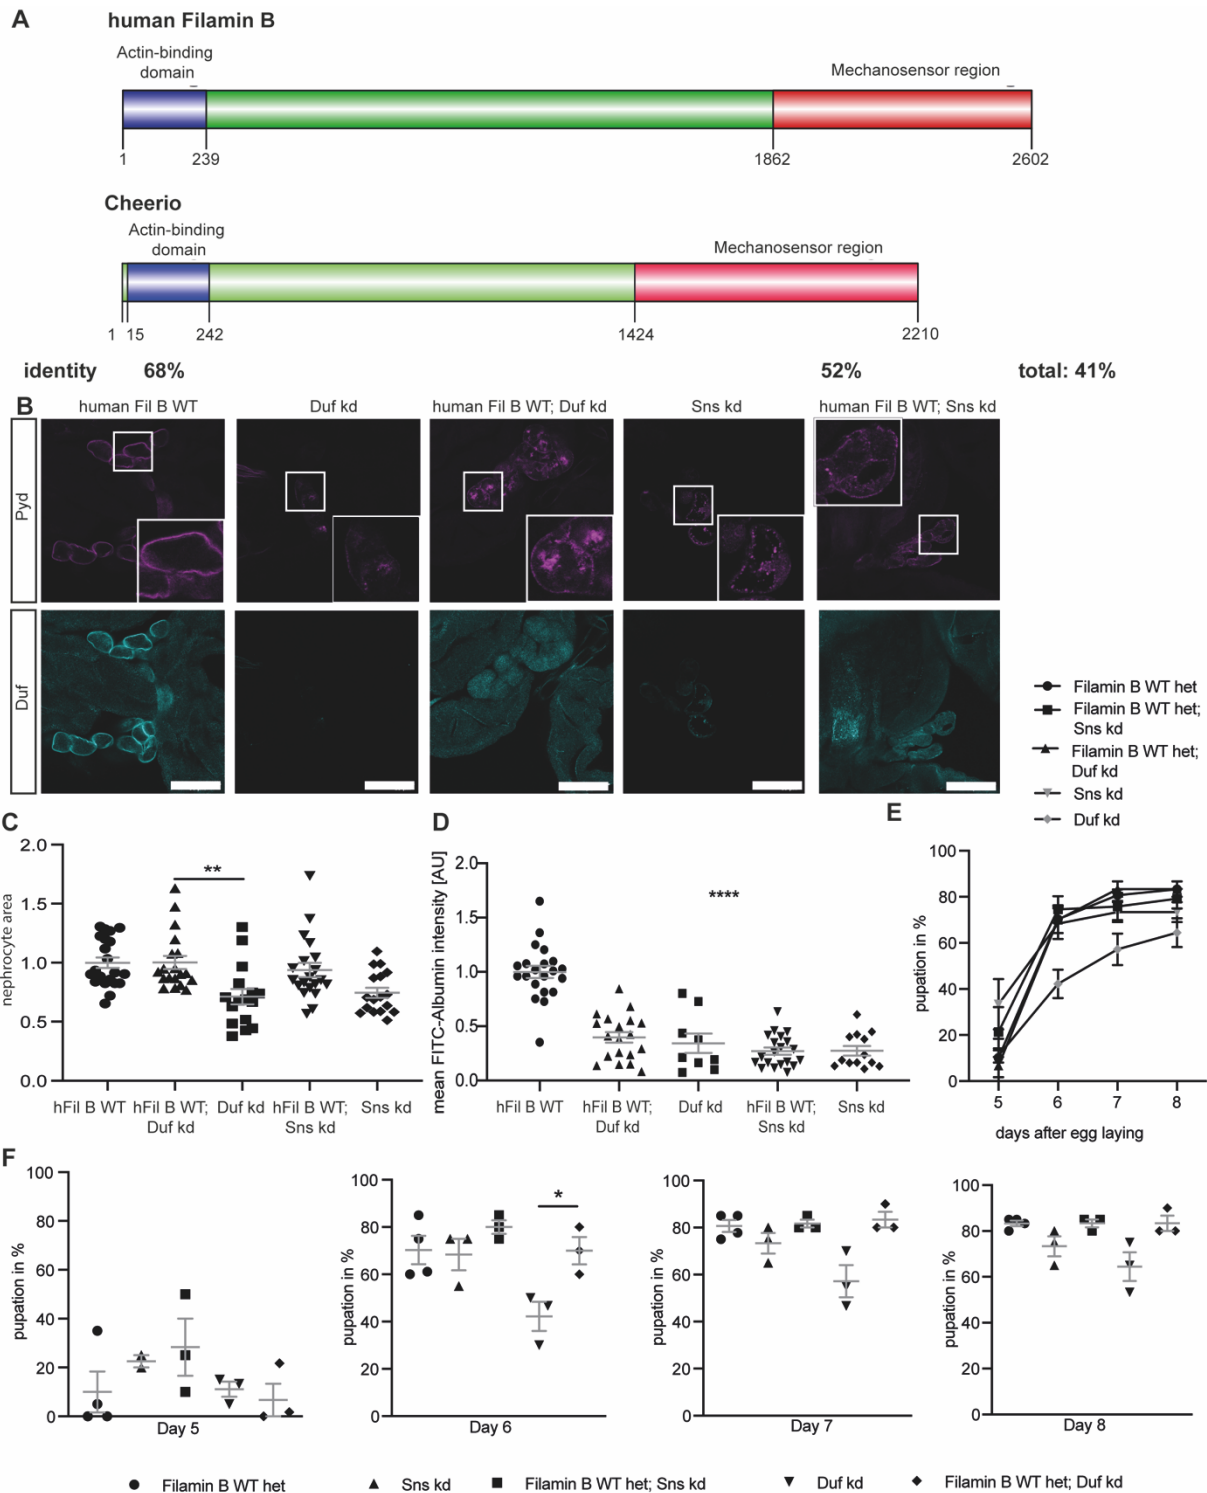

1  
2  
3  
4  
5  
6  
7  
8  
9  
10  
11  
12

**Figure 3: Human Filamin B rescues nephrocyte size and function.** **A** Schematic of human Filamin B wildtype and *Drosophila* Cheerio wildtype. Both possess an actin-binding domain at the N-terminus, which shows a sequence identity of 68%. This domain is followed by the IgG domains, which form the mechanosensor region at the C-terminus. The MSR shows a sequence identity of 52%. **B** Expression of human Filamin B wildtype (human Fil B WT) in Duf and Sns depleted nephrocytes did not restore morphology. Scale bar = 25  $\mu$ m. hFil B WT; *w;sns-Gal4/+;UAS-hFilamin B WT/+*; Duf kd: *w;sns-Gal4/+;UAS-duf-RNAi/UAS-dicer2*; hFil B WT; Duf kd: *w;sns-Gal4/+;UAS-hFilamin B WT/UAS-duf-RNAi*; Sns kd: *w;sns-Gal4/+;UAS-sns-RNAi/UAS-dicer2*; hFil B WT; Sns kd: *w;sns-Gal4/+;UAS-hFilamin B WT/UAS-sns-RNAi*. **C** Nephrocyte size was restored by expressing human Filamin B wildtype. One-way ANOVA plus Tukey's multiple comparisons test: \*\*:  $p < 0.01$ . **D** FITC Albumin uptake

1 is not rescued by expression of the human Filamin B wildtype. One-way ANOVA plus Tukey's multiple  
2 comparisons test: \*\*\*\*:  $p < 0.0001$ . **E** AgNO<sub>3</sub> toxin assay revealed a rescue of the delayed pupation  
3 when human Filamin B wildtype was expressed simultaneously to the Duf or Sns RNAi. One-way  
4 ANOVA plus Tukey's multiple comparisons test: \*:  $p < 0.05$ .

5

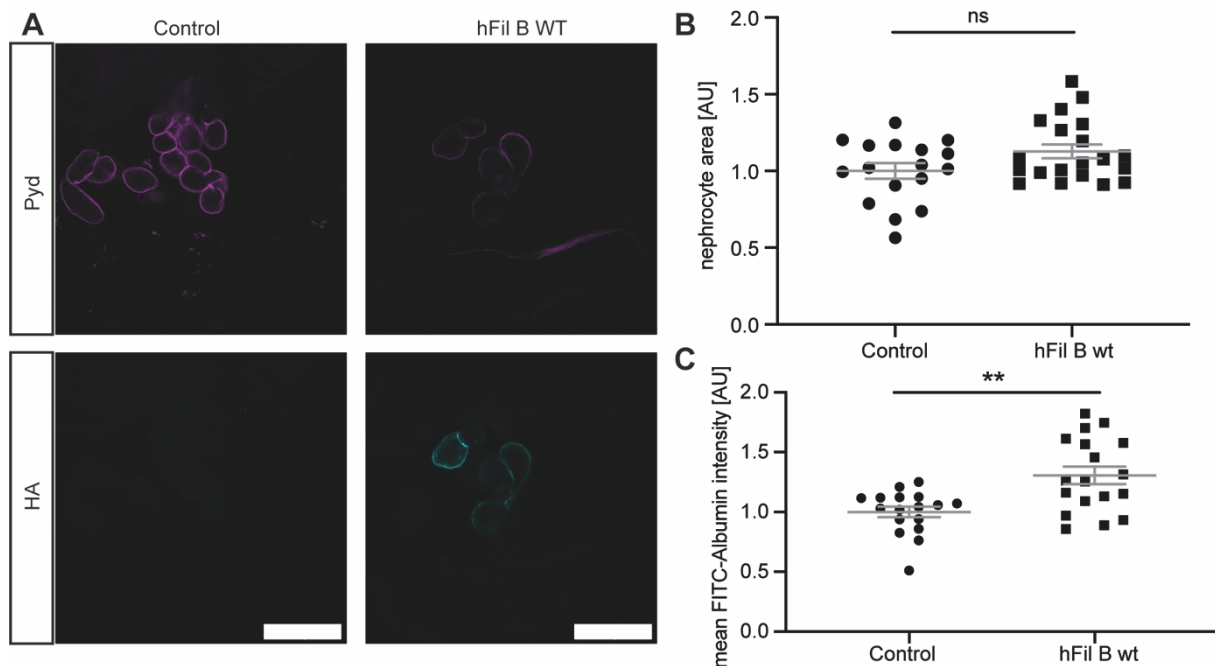

6

7 **Supp. Figure 4: Human Filamin B localizes to the nephrocyte diaphragm and results in only a**  
8 **mild nephrocyte phenotype.** **A** The human Filamin B construct expresses a C-terminal HA-tag, which  
9 was used for visualisation of the construct. Filamin B localized to the cell cortex. Scale bar = 25  $\mu$ m.  
10 Control:  $w^{1118}$ ; h Fil B WT:  $w;sns-Gal4;UAS-hFilamin B WT$ . **B** Overexpression of human Filamin B  
11 wildtype resulted in a slight size increase, which was not significant. Control:  $w;sns-$   
12  $Gal4/+;MKRS/TM6B$ ; h Fil B WT:  $w;sns-Gal4;UAS-hFilamin B WT/+$ . **C** FITC-Albumin assays reveal an  
13 increase of Albumin uptake in nephrocytes expressing human Filamin B. Student's t-test: \*\*:  $p < 0.01$ .

14

15

## 16 **TOR and Yorkie signalling induce nephrocyte hypertrophy and appear to be** 17 **downstream targets of Cheerio**

18 The above results show a hypertrophy phenotype and protective role for  
19 Cheerio, while human Filamin B restored cell size and filtration function. To identify the  
20 downstream pathway that mediates these effects we performed a candidate screen  
21 examining three different pathways known to be involved in cell proliferation and tissue  
22 growth; TOR, Wingless (WNT) and Hippo (Huang et al., 2005; Laplante and Sabatini,  
23 2012; Niehrs and Acebron, 2012). The over-activation of TOR, Yorkie (Yap/Taz; Hippo  
24 pathway) and armadillo ( $\beta$ -Catenin; WNT pathway) in nephrocytes resulted in a

1 significant size increase to a degree similar to active Cheerio, consistent with the notion  
2 that one or more of these pathways acts downstream of Cheerio (**Figure 4A,B,C**). To  
3 help assess whether these pathways mediate the hypertrophic phenotype observed in  
4 nephrocytes expressing active Cheerio, we asked whether repression of these  
5 pathways is able to block the hypertrophic phenotype caused by active Cheerio. In  
6 detail, we expressed a dominant-negative TOR variant (TOR-DN), or overexpressed  
7 Hippo (dMST) to repress Yrk, in combination with expression of active Cheerio. (We  
8 also attempted to address whether WNT signalling was implicated by expressing a  
9 constitutive repressor version of the WNT effector pangolin (dTcf) (WNT DN). We  
10 were unable to interpret this experiment as WNT pathway repression resulted in the  
11 complete loss of nephrocytes, suggesting an important role of WNT signalling for the  
12 development and maintenance of nephrocytes, which is in line with previous reports  
13 for mammalian models (Carroll et al., 2005; Dai et al., 2009; Iglesias et al., 2007).) The  
14 repression of TOR signalling in active Cheerio expressing nephrocytes resulted in a  
15 significant size decrease back to normal levels (Cheerio inactive) (**Figure 4D**).  
16 Similarly, repression of Yrk by expressing hippo in the presence of active Cheerio also  
17 resulted in a significant size decrease (**Figure 4E**). These data are compatible with  
18 TOR and Yorkie acting in a pathway(s) downstream of Cheerio. However, TOR  
19 repression or Hippo overexpression in a wild-type background (i.e. without activated  
20 Cheerio), both resulted in a significant size decrease (**Figure 4F,G**). Therefore, we  
21 cannot exclude the possibility that TOR and Yorkie pathways act independently of  
22 Cheerio.

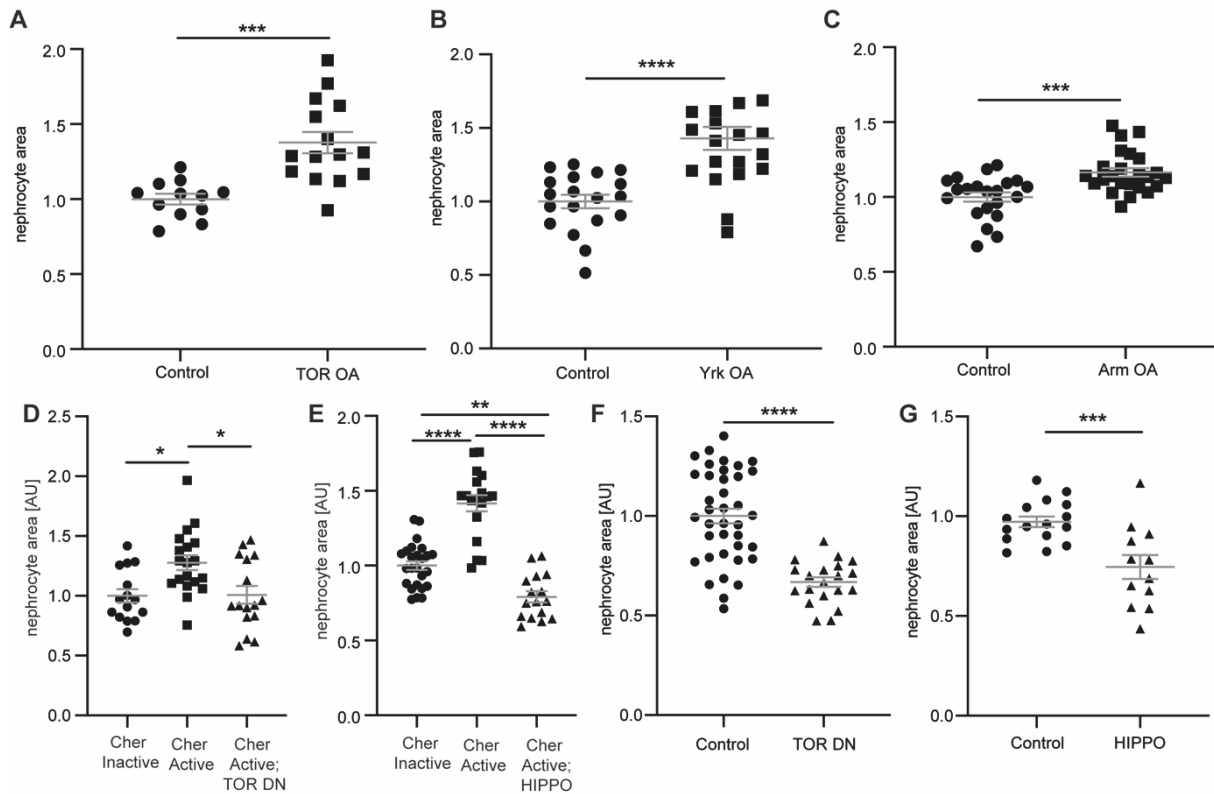

1

2 **Figure 4: TOR and Hippo signalling mediate the hypertrophy phenotype in nephrocytes.** A Over-  
 3 activation of TOR signalling in nephrocytes caused a significant hypertrophy phenotype. Control: *w;sns-*  
 4 *Gal4/+;UAS-dicer2/+*; TOR OA: *w;sns-Gal4/UAS-rheb;UAS-dicer2/UAS-tor-wildtype*. Student's t-test:  
 5 \*\*\*:  $p < 0.001$ . B Hyperactivation of Yorkie (Yap/Taz) in nephrocytes revealed a hypertrophy effect as  
 6 well. Control: *w;sns-Gal4/+;UAS-dicer2/+*; Yrk OA: *w;sns-Gal4/+;UAS-dicer2/UAS-*  
 7 *yki.S111A.S168A.S250A.V5*. Student's t-test: \*\*\*\*:  $p < 0.0001$ . C Expression of constitutively active  
 8 Armadillo ( $\beta$ -Catenin) resulted in a significant size increase in nephrocytes. Control: *w;sns-Gal4/+;UAS-*  
 9 *dicer2/+*; WNT OA: *UAS-arm.S10/w;sns-Gal4/+;UAS-dicer2/+*. Student's t-test: \*\*\*:  $p < 0.001$ . D  
 10 Quantification of the cell size based on GFP-tags to the Cheerio constructs revealed a significant size  
 11 increase of Cher Active when compared to Cher Inactive cells. This increase was completely reversed  
 12 when TOR signalling was inhibited with a dominant negative TOR variant (TOR DN). Cher Inactive:  
 13 *w;sns-Gal4/+;UAS-cher Inactive/+*; Cher Active: *w;sns-Gal4/+;UAS-cher active/+*; Cher Active; TOR  
 14 DN: *w;sns-Gal4/+;UAS-cher active/UAS-tor-dominant-negative*. One-way ANOVA plus Tukey's multiple  
 15 comparisons test: \*:  $p < 0.05$ . E Combination of Cher Active with Hippo, which results in the inhibition  
 16 of Yorkie (Yap/Taz) caused a significant reduction of nephrocyte size, even below the cell size of Cher  
 17 Inactive nephrocytes. Cher Inactive: *w;sns-Gal4/+;UAS-cher Inactive/+*; Cher Active: *w;sns-*  
 18 *Gal4/+;UAS-cher active/+*; Cher Active; HIPPO: *w;sns-Gal4/+;UAS-cher active/UAS-hippo(dmST).flag*.  
 19 One-way ANOVA plus Tukey's multiple comparisons test: \*\*:  $p < 0.01$ ; \*\*\*\*:  $p < 0.0001$ . F FITC Albumin  
 20 assays revealed a significant size decrease when dominant negative TOR is expressed exclusively.  
 21 Control: *w;sns-Gal4/+;UAS-dicer2/+*; TOR DN: *w;sns-Gal4/+;UAS-dicer2/UAS-tor-dominant-negative*.  
 22 Student's t-test: \*\*\*\*:  $p < 0.0001$ . G Expression of Hippo also resulted in a significant size decrease as  
 23 assessed with FITC Albumin assays. Control: *w;sns-Gal4/+;UAS-dicer2/+*; HIPPO: *w;sns-Gal4/+;UAS-*  
 24 *dicer2/UAS-hippo(dmST).flag*. Student's t-test: \*\*\*:  $p < 0.001$ .

25

26

1 **Excessive increase of Cheerio and Filamin B levels resulted in a pathological**  
2 **effect**

3         Cheerio and Filamin B exhibit a protective role during injury in nephrocytes.  
4 Previous studies have shown that gain-of-function mutations in the mechanosensor  
5 TRPC6 caused a severe podocyte phenotype (Reiser et al., 2005, p. 6; Winn et al.,  
6 2005, p. 6). To address whether an excessive increase of Cheerio activity also result  
7 in a pathological phenotype, we generated lines homozygous for UAS-Cheerio or UAS-  
8 Filamin B (i.e. with two copies), with the aim of increasing the activity of Cheerio/Filamin  
9 B. Expression of a double dose of Cheerio or Filamin B produced a pathological  
10 phenotype, as nephrocyte morphology was severely disrupted, FITC-Albumin uptake  
11 was significantly decreased and pupal development in the presence of AgNO<sub>3</sub> was  
12 significantly delayed (**Figure 5B,C,D,E,F,G, Supp. Figure 5A,B,D,E**). Interestingly,  
13 the previously observed hypertrophy phenotype is not present in the homozygous flies  
14 (**Figure 5A**). Together with the data described above, this suggests that a moderate  
15 increase in Cheerio activation is beneficial and protective under conditions of injury,  
16 but beyond a certain level Cheerio activation becomes pathological. In further support  
17 of this, flies expressing the different Cheerio variants as single copy but raised at 28°C  
18 to increase protein levels, also presented with a severe morphological phenotype  
19 (**Supp. Figure 5C**).

20

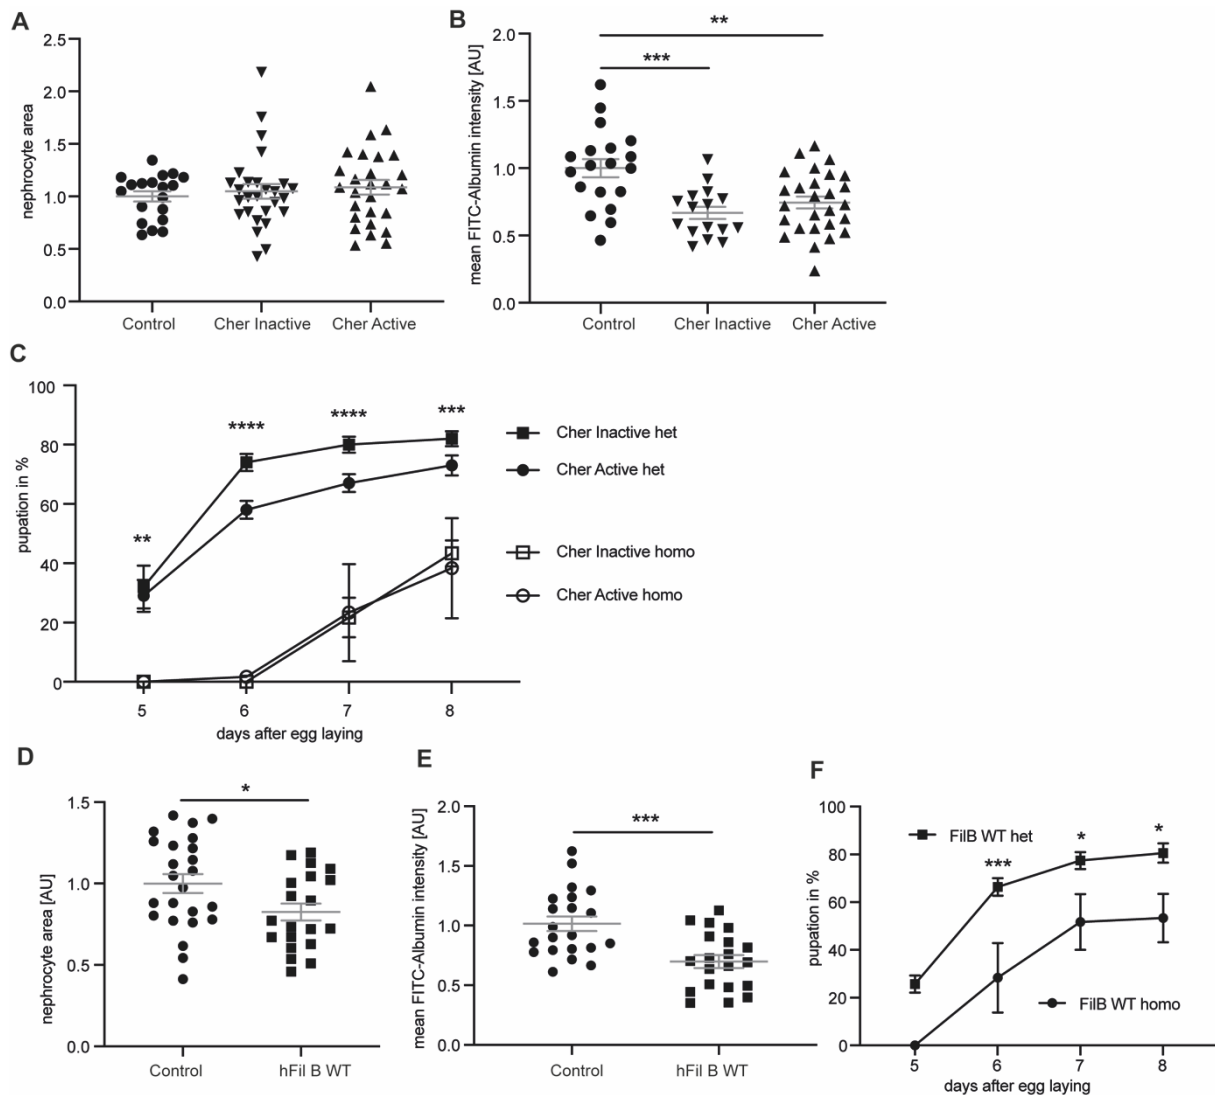

1

2 **Figure 5: Excessive increase of Cheerio and Filamin B levels results in a pathological response.**

3 **A** Homozygous Active or Inactive Cheerio were used to increase the level of protein expression in  
4 nephrocytes. Comparison with control flies (*w;sns-Gal4;MKRS/TM6B*) revealed no difference in  
5 nephrocyte size. Cher Inactive: *w;sns-Gal4;UAS-cher-inactive*; Cher Active: *w;sns-Gal4;UAS-cher-*  
6 *active*. **B** FITC-Albumin uptake was significantly decreased in both genotypes (Inactive and Active  
7 Cheerio). One-way ANOVA plus Tukey's multiple comparisons test: \*\*:  $p < 0.01$ . **C** The  $\text{AgNO}_3$  toxin  
8 assay revealed a severely delayed pupation in homozygous flies when compared to their heterozygous  
9 controls. Cher Inactive het: *w;sns-Gal4/+;UAS-cher-inactive/UAS-dicer2*; Cher Active: *w;sns-*  
10 *Gal4/+;UAS-cher-active/UAS-dicer2*; Cher Inactive homo: *w;sns-Gal4;UAS-cher-inactive*; Cher Active  
11 homo: *w;sns-Gal4;UAS-cher-active*. Two-way ANOVA plus Tukey's multiple comparisons test: \*\*:  $p <$   
12  $0.01$ ; \*\*\*:  $p < 0.001$ ; \*\*\*\*:  $p < 0.0001$ . **D** Homozygous expression of human Filamin B wildtype resulted  
13 in a significant size decrease. Student's t-test: \*:  $p < 0.05$ . Control: *w;sns-Gal4;MKRS/TM6B*; hFil B WT:  
14 *w;sns-Gal4;UAS-hFilamin B WT*. **E** FITC Albumin uptake was severely impaired by homozygous  
15 expression of human Filamin B wildtype. Student's t-test: \*\*\*:  $p < 0.001$ . **F** Comparison of homozygous  
16 and heterozygous controls in the  $\text{AgNO}_3$  toxin assay also revealed severe filtration defects. Two-way  
17 ANOVA plus Tukey's multiple comparisons test: \*:  $p < 0.05$ ; \*\*\*:  $p < 0.001$ .

18



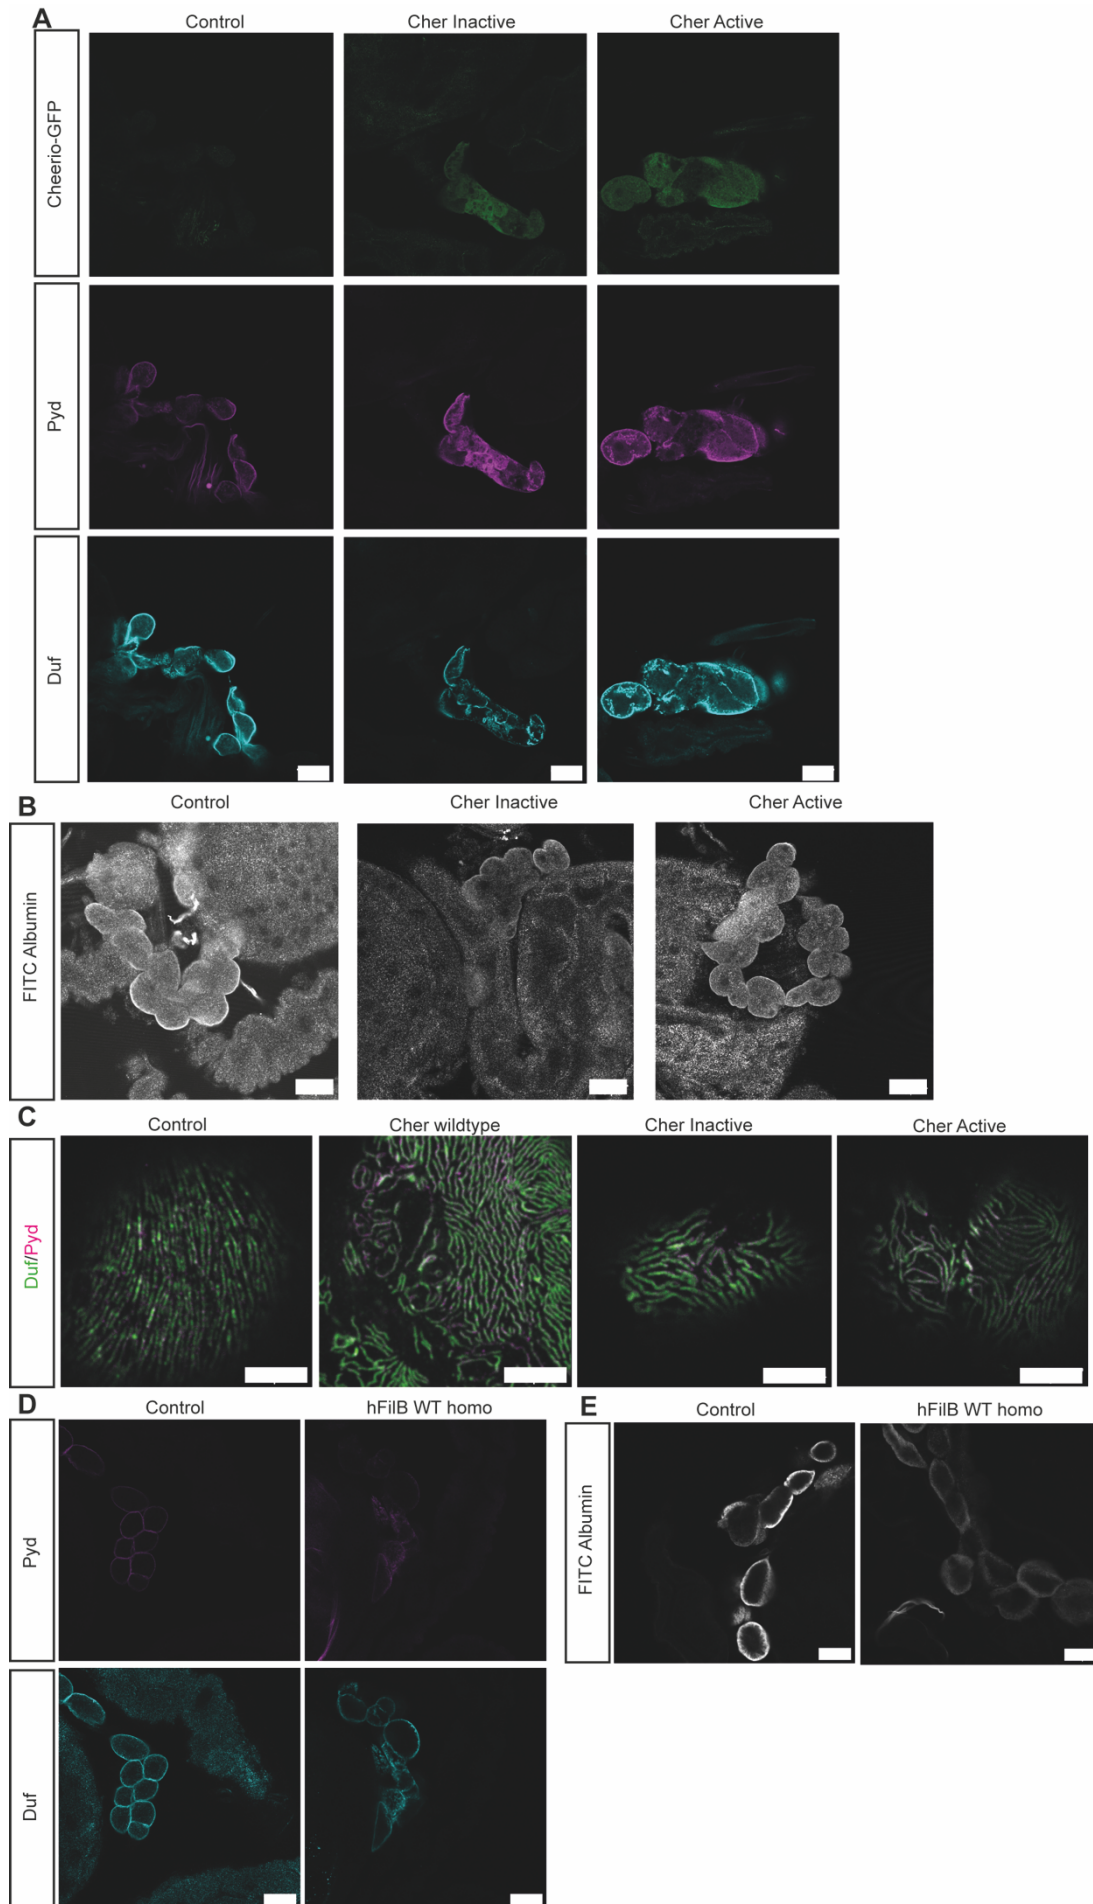

1 **Supp. Figure 5: Excessive expression of Cheerio and human Filamin B result in a severe**  
2 **nephrocyte phenotype.** **A** Immunofluorescence using a Duf and Pyd antibody revealed a  
3 morphological phenotype, when Cheerio Active and Inactive are homozygously expressed. Scale bar =  
4 25  $\mu\text{m}$ . Control: *w;sns-Gal4;MKRS/TM6B*; Cher Inactive: *w;sns-Gal4;UAS-cher-inactive*; Cher Active:  
5 *w;sns-Gal4;UAS-cher-active*. **B** FITC Albumin assays show a decreased uptake capacity in nephrocytes  
6 expressing either Cheerio active or Cheerio inactive. Scale bar = 25  $\mu\text{m}$ . **C** Immunofluorescence staining  
7 using Duf and Pyd antibodies revealed morphological changes in nephrocytes expressing Cheerio  
8 wildtype, inactive and active at 28°C. Control: *w;sns-Gal4;UAS-dicer2*, Cher wildtype: *w;sns-Gal4/UAS-*  
9 *cher-wildtype-MSR;UAS-dicer2/+*, Cher Inactive: *w;sns-Gal4/+;UAS-dicer2/UAS-cher-inactive-MSR*,  
10 Cher Active: *w;sns-Gal4/+;UAS-dicer2/UAS-cher-active-MSR*. Scale bar = 5  $\mu\text{m}$ . **D**  
11 Immunofluorescence staining with Duf and Pyd antibodies revealed changes of morphology in  
12 nephrocytes expressing human Filamin B wildtype. Scale bar = 25  $\mu\text{m}$ . Control: *w;sns-*  
13 *Gal4;MKRS/TM6B*; hFil B WT: *w;sns-Gal4;UAS-hFilamin B WT*. **E** FITC Albumin uptake assays  
14 revealed a significant filtration defect after homozygous expression of human Filamin B wildtype. Scale  
15 bar = 25  $\mu\text{m}$ .

16

## 17 **Discussion**

18 Recent studies revealed an important role of the mechanosensor Filamin in  
19 podocyte biology, as both Filamin A and B were described to be upregulated under  
20 conditions of increased mechanical force, in several mammalian injury models and  
21 glomerular patient tissue (Greiten et al., 2021; Koehler et al., 2020; Okabe et al., 2021).  
22 In addition, it was previously shown that a nephrocyte-specific loss of Cheerio did not  
23 result in any change to nephrocyte diaphragm integrity or filtration function (Koehler et  
24 al., 2020). However, the function of Cheerio/Filamin in nephrocytes/podocytes is not  
25 known.

26 Based on these findings we asked whether Cheerio/Filamin exhibits a protective  
27 role during injury. To investigate this hypothesis, we utilized the *Drosophila* nephrocyte  
28 model and examined the functional role of Cheerio, the Filamin homologue in the fly.  
29 Our data show that an over-activation of the mechanosensor domain caused a  
30 hypertrophy phenotype in nephrocytes, but did not impact on nephrocyte diaphragm  
31 integrity or filtration function. The link between Filamin B and the hypertrophy  
32 phenotype was also recently observed in a mouse model investigating secondary  
33 injured podocytes (Okabe et al., 2021). In a novel partial podocytectomy mouse model

1 (loss of a subpopulation of podocytes) Okabe et al. (May 2021) induced podocyte injury  
2 only in a subset of podocytes resulting in secondary damage in the remaining cells.  
3 Additional transcriptomics analysis revealed an upregulation of Filamin B and a  
4 hypertrophy phenotype in the remaining podocytes (Okabe et al., 2021).

5 An increased fluid flow causes an increased hydrostatic pressure in the  
6 capillaries during injury and disease. As a result, the filtration barrier, including the  
7 glomerular basement membrane, endothelial cells and podocytes will expand to  
8 reduce the filtrate flow per unit filtration area. However, this expansion is limited and  
9 will be followed by an increase of shear stress in the filtration slits and between  
10 podocytes in the Bowman's capsule, resulting in podocyte detachment and loss (Butt  
11 et al., 2020; Kriz and Lemley, 2017). This loss of a podocyte subpopulation causes an  
12 additional increase of biomechanical forces and the remaining podocytes need to  
13 activate adaptive mechanisms to remain attached to the basement membrane and to  
14 cover the blank basement membrane areas (Koehler and Rinschen, 2021; Kriz and  
15 Lemley, 2017).

16 The upregulation of the mechanosensor Filamin B and the observed  
17 hypertrophy phenotype in podocytes and nephrocytes further support this hypothesis.  
18 Hypertrophy was previously described to serve as a protective mechanism during  
19 podocyte injury, as podocytes try to cover blank capillaries after loss of neighbouring  
20 cells by increasing their cell size (Puelles et al., 2019; Wiggins et al., 2005).

21 Interestingly, Cheerio translocates and accumulates at the cell cortex upon  
22 injury in nephrocytes. Previous studies in fibroblasts reported that active Filamin  
23 accumulates at the cell cortex, while inactive Filamin remains mainly cytoplasmic  
24 (Nakamura et al., 2014; Razinia et al., 2012). In line with that, we also found that active  
25 Cheerio localized to the nephrocyte cortex, whereas the inactive variant remained  
26 cytoplasmic (**Figure 6**). Interestingly, inactive Cheerio (variant engineered to be less

1 responsive to mechanical force) accumulates at the cortex in injured nephrocytes  
2 (upon loss of Duf and Sns). It is possible that during injury the forces experienced by  
3 Cheerio are such that even this 'inactive' variant is activated and translocates to the  
4 cell periphery and nephrocyte diaphragm.

5 Our data also shows that the expression of active Cheerio caused a rescue of  
6 nephrocyte function in Sns and Duf depleted cells (**Figure 6**). Similar effects were  
7 observed when expressing the inactive variant. Of note, inactive Cheerio seems to be  
8 activated during injury based on its localisation at the periphery.

9 In addition, expressing human Filamin B suggested that this protective effect is  
10 evolutionarily conserved. As the human Filamin B construct also possessed the ACB  
11 and expression of human Filamin B rescued cell size during injury, we speculate that  
12 the ACB plays a role in cell size control.

13 Moreover, our data provides evidence that the levels of Cheerio and Filamin B  
14 need to be tightly controlled as excessive levels result in a severe nephrocyte  
15 phenotype, indicating a threshold where protective effects tip toward a pathological  
16 condition (**Figure 6**). We have also provided evidence that hypertrophy might be  
17 mediated by TOR and/or Hippo pathways (**Figure 6**). In line with our data, overactive  
18 mTOR caused a hypertrophy phenotype in mouse podocytes, which is associated with  
19 a protective effect during injury (Puelles et al., 2019). Moreover, several studies show  
20 that loss of YAP in podocytes causes a glomerular disease (FSGS) phenotype  
21 (Schwartzman et al., 2016), that YAP activation has a protective effect during injury  
22 (Meliambro et al., 2017) and that nuclear localization/activation of YAP has a pro-  
23 survival effect in podocytes (Bonse et al., 2018). Interestingly, in FSGS patient tissue,  
24 mTOR target genes were upregulated (Puelles et al., 2019), while inactive phospho-  
25 YAP levels were increased (Meliambro et al., 2017; Schwartzman et al., 2016). These  
26 findings, together with the upregulated Filamin B levels in podocyte models, indicate

1 that the mechanisms investigated within this project might be highly evolutionarily  
2 conserved and that TOR and YAP might be downstream targets of Filamin in mammals  
3 as well.

4 In a recent study, Greiten et al. described the functional role of Filamin A in  
5 podocytes, and showed that loss of Filamin A caused a rearrangement of the actin-  
6 cytoskeleton and decreased expression levels of focal adhesion associated proteins  
7 (Greiten et al., 2021). They also showed increased Filamin A levels during  
8 hypertension in mouse models and hypertensive glomerular patient tissue (Greiten et  
9 al., 2021), again supporting our hypothesis of a protective role of Cheerio and Filamin  
10 during injury, when expressed at moderate levels.

11 Taken together, our data show that Cheerio is activated during injury, which  
12 result in a protective hypertrophy phenotype, possibly mediated via TOR and Hippo  
13 signalling (**Figure 6**). However, Cheerio and Filamin levels need to be tightly  
14 controlled, as an excessive increase of activity result in a shift from the protective effect  
15 to a pathological response (**Figure 6**).

16

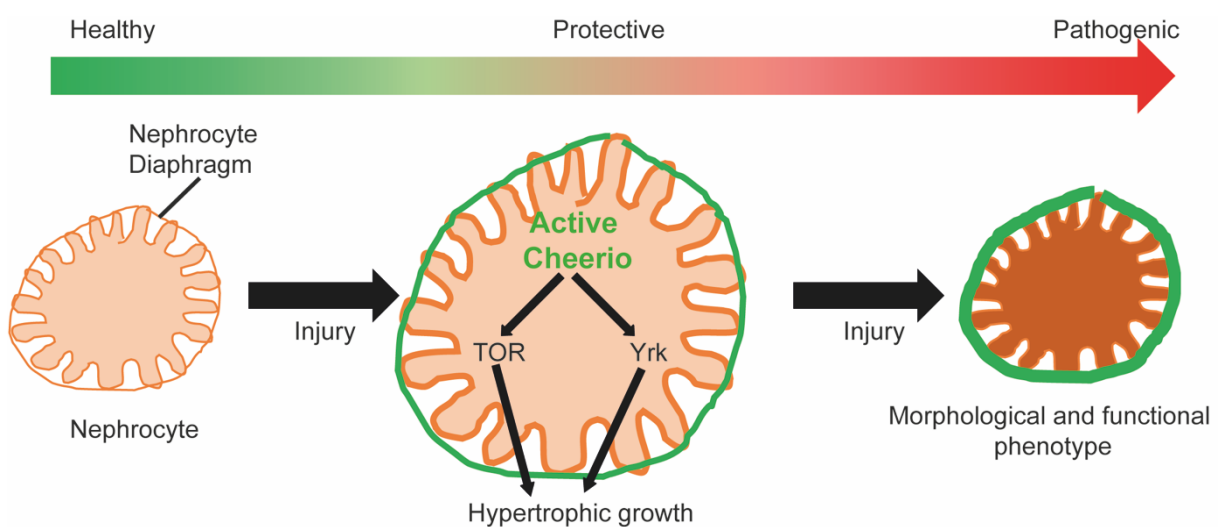

17

18 **Figure 6: The mechano-protective role of Cheerio in *Drosophila* nephrocytes.** Cheerio is active  
19 during injury and accumulates at the cell periphery. This activation and the increased protein levels  
20 result in a mechano-protective effect via hypertrophic growth, mediated via TOR and Hippo signalling.  
21 However, Cheerio levels need to be tightly controlled, as excessive increase of protein levels results in  
22 a shift from the protective to a pathogenic effect, including a morphological and functional phenotype.

## 1 **Author contribution**

2 S.K. conceived the study, performed experiments, analysed the data, made the figures  
3 and drafted the paper, B.D. revised the study critically for important intellectual content,  
4 S.K. and B.D. revised the paper; both authors approved the final version of the  
5 manuscript.

6

7

## 8 **Acknowledgement**

9

10 The Anti-Pyd monoclonal antibody developed by Fanning (Choi et al., 2011) was  
11 obtained from the Developmental Studies Hybridoma Bank, created by the NICHD of  
12 the NIH and maintained at The University of Iowa, Department of Biology, Iowa City,  
13 IA 52242.

14

## 15 **Funding**

16

17 S.K. received funding from the German Research Foundation (KO 6045/1).

18

## 19 **Conflict of Interest**

20

21 None. The authors have nothing to disclose.

22

## 23 **Literature**

- 24 *Anderson M, Kim EY, Hagmann H, Benzing T, Dryer SE. 2013. Opposing effects of*  
25 *podocin on the gating of podocyte TRPC6 channels evoked by membrane*  
26 *stretch or diacylglycerol. Am J Physiol - Cell Physiol* **305**:C276–C289.  
27 *doi:10.1152/ajpcell.00095.2013*
- 28 *Arakawa M. 1970. A scanning electron microscopy of the glomerulus of normal and*  
29 *nephrotic rats. Lab Invest J Tech Methods Pathol* **23**:489–496.
- 30 *Bonse J, Wennmann DO, Kremerskothen J, Weide T, Michgehl U, Pavenstädt H,*  
31 *Vollenbröcker B. 2018. Nuclear YAP localization as a key regulator of podocyte*  
32 *function. Cell Death Dis* **9**:1–14. *doi:10.1038/s41419-018-0878-1*
- 33 *Butt L, Unnersjö-Jess D, Höhne M, Edwards A, Binz-Lotter J, Reilly D, Hahnfeldt R,*  
34 *Ziegler V, Fremter K, Rinschen MM, Helmstädter M, Ebert LK, Castrop H,*  
35 *Hackl MJ, Walz G, Brinkkoetter PT, Liebau MC, Tory K, Hoyer PF, Beck BB,*  
36 *Brismar H, Blom H, Schermer B, Benzing T. 2020. A molecular mechanism*  
37 *explaining albuminuria in kidney disease. Nat Metab* **2**:461–474.  
38 *doi:10.1038/s42255-020-0204-y*

- 1 Carroll TJ, Park J-S, Hayashi S, Majumdar A, McMahon AP. 2005. *Wnt9b Plays a*  
2 *Central Role in the Regulation of Mesenchymal to Epithelial Transitions*  
3 *Underlying Organogenesis of the Mammalian Urogenital System.* *Dev Cell*  
4 **9**:283–292. doi:10.1016/j.devcel.2005.05.016
- 5 Choi W, Jung K-C, Nelson KS, Bhat MA, Beitel GJ, Peifer M, Fanning AS. 2011. *The*  
6 *single Drosophila ZO-1 protein Polychaetoid regulates embryonic*  
7 *morphogenesis in coordination with Canoe/afadin and Enabled.* *Mol Biol Cell*  
8 **22**:2010–2030. doi:10.1091/mbc.E10-12-1014
- 9 Dai C, Stolz DB, Kiss LP, Monga SP, Holzman LB, Liu Y. 2009. *Wnt/ $\beta$ -Catenin*  
10 *Signaling Promotes Podocyte Dysfunction and Albuminuria.* *J Am Soc Nephrol*  
11 *JASN* **20**:1997–2008. doi:10.1681/ASN.2009010019
- 12 Dalkilic I, Schienda J, Thompson TG, Kunkel LM. 2006. *Loss of FilaminC (FLNc)*  
13 *results in severe defects in myogenesis and myotube structure.* *Mol Cell Biol*  
14 **26**:6522–6534. doi:10.1128/MCB.00243-06
- 15 Endlich K, Kliewe F, Endlich N. 2017. *Stressed podocytes-mechanical forces,*  
16 *sensors, signaling and response.* *Pflugers Arch* **469**:937–949.  
17 doi:10.1007/s00424-017-2025-8
- 18 Endlich N, Kress KR, Reiser J, Uttenweiler D, Kriz W, Mundel P, Endlich K. 2001.  
19 *Podocytes respond to mechanical stress in vitro.* *J Am Soc Nephrol JASN*  
20 **12**:413–422.
- 21 Faul C, Asanuma K, Yanagida-Asanuma E, Kim K, Mundel P. 2007. *Actin up:*  
22 *regulation of podocyte structure and function by components of the actin*  
23 *cytoskeleton.* *Trends Cell Biol* **17**:428–437. doi:10.1016/j.tcb.2007.06.006
- 24 Feng Y, Chen MH, Moskowitz IP, Mendonza AM, Vidali L, Nakamura F, Kwiatkowski  
25 DJ, Walsh CA. 2006. *Filamin A (FLNA) is required for cell-cell contact in*  
26 *vascular development and cardiac morphogenesis.* *Proc Natl Acad Sci U S A*  
27 **103**:19836–19841. doi:10.1073/pnas.0609628104
- 28 Forst A-L, Olteanu VS, Mollet G, Wlodkowski T, Schaefer F, Dietrich A, Reiser J,  
29 Gudermann T, Mederos y Schnitzler M, Storch U. 2016. *Podocyte Purinergic*  
30 *P2X4 Channels Are Mechanotransducers That Mediate Cytoskeletal*  
31 *Disorganization.* *J Am Soc Nephrol JASN* **27**:848–862.  
32 doi:10.1681/ASN.2014111144
- 33 Greiten JK, Kliewe F, Schnarre A, Artelt N, Schröder S, Rogge H, Amann K, Daniel  
34 C, Lindenmeyer MT, Cohen CD, Endlich K, Endlich N. 2021. *The role of*  
35 *filamins in mechanically stressed podocytes.* *FASEB J Off Publ Fed Am Soc*  
36 *Exp Biol* **35**:e21560. doi:10.1096/fj.202001179RR
- 37 Hart AW, Morgan JE, Schneider J, West K, McKie L, Bhattacharya S, Jackson IJ,  
38 Cross SH. 2006. *Cardiac malformations and midline skeletal defects in mice*  
39 *lacking filamin A.* *Hum Mol Genet* **15**:2457–2467. doi:10.1093/hmg/ddl168
- 40 Hayakawa K, Tatsumi H, Sokabe M. 2011. *Actin filaments function as a tension*  
41 *sensor by tension-dependent binding of cofilin to the filament.* *J Cell Biol*  
42 **195**:721–727. doi:10.1083/jcb.201102039
- 43 Hermle T, Braun DA, Helmstädter M, Huber TB, Hildebrandt F. 2017. *Modeling*  
44 *Monogenic Human Nephrotic Syndrome in the Drosophila Garland Cell*  
45 *Nephrocyte.* *J Am Soc Nephrol JASN* **28**:1521–1533.  
46 doi:10.1681/ASN.2016050517
- 47 Huang J, Wu S, Barrera J, Matthews K, Pan D. 2005. *The Hippo signaling pathway*  
48 *coordinately regulates cell proliferation and apoptosis by inactivating Yorkie,*  
49 *the Drosophila Homolog of YAP.* *Cell* **122**:421–434.  
50 doi:10.1016/j.cell.2005.06.007

- 1 *Huelsmann S, Rintanen N, Sethi R, Brown NH, Ylännä J. 2016. Evidence for the*  
2 *mechanosensor function of filamin in tissue development. Sci Rep 6:32798.*  
3 *doi:10.1038/srep32798*
- 4 *Iglesias DM, Hueber P-A, Chu L, Campbell R, Patenaude A-M, Dziarmaga AJ,*  
5 *Quinlan J, Mohamed O, Dufort D, Goodyer PR. 2007. Canonical WNT*  
6 *signaling during kidney development. Am J Physiol Renal Physiol 293:F494-*  
7 *500. doi:10.1152/ajprenal.00416.2006*
- 8 *Koehler S, Kuczkowski A, Kuehne L, Jüngst C, Hoehne M, Grahammer F, Eddy S,*  
9 *Kretzler M, Beck BB, Höfeld J, Schermer B, Benzing T, Brinkkoetter PT,*  
10 *Rinschen MM. 2020. Proteome Analysis of Isolated Podocytes Reveals Stress*  
11 *Responses in Glomerular Sclerosis. J Am Soc Nephrol JASN 31:544–559.*  
12 *doi:10.1681/ASN.2019030312*
- 13 *Koehler S, Rinschen MM. 2021. A stressed barrier left behind: stochastic podocyte*  
14 *ablation triggers secondary injury. Am J Physiol Renal Physiol 320:F866–*  
15 *F869. doi:10.1152/ajprenal.00109.2021*
- 16 *Kriz W, Lemley KV. 2017. Potential relevance of shear stress for slit diaphragm and*  
17 *podocyte function. Kidney Int 91:1283–1286. doi:10.1016/j.kint.2017.02.032*
- 18 *Kriz W, Lemley KV. 2015. A Potential Role for Mechanical Forces in the Detachment*  
19 *of Podocytes and the Progression of CKD. J Am Soc Nephrol 26:258–269.*  
20 *doi:10.1681/ASN.2014030278*
- 21 *Külshammer E, Uhlirova M. 2013. The actin cross-linker Filamin/Cheerio mediates*  
22 *tumor malignancy downstream of JNK signaling. J Cell Sci 126:927–938.*  
23 *doi:10.1242/jcs.114462*
- 24 *Lad Y, Kiema T, Jiang P, Pentikäinen OT, Coles CH, Campbell ID, Calderwood DA,*  
25 *Ylännä J. 2007. Structure of three tandem filamin domains reveals auto-*  
26 *inhibition of ligand binding. EMBO J 26:3993–4004.*  
27 *doi:10.1038/sj.emboj.7601827*
- 28 *Laplane M, Sabatini DM. 2012. mTOR signaling in growth control and disease. Cell*  
29 *149:274–293. doi:10.1016/j.cell.2012.03.017*
- 30 *Meliambro K, Wong JS, Ray J, Calizo RC, Towne S, Cole B, El Salem F, Gordon RE,*  
31 *Kaufman L, He JC, Azeloglu EU, Campbell KN. 2017. The Hippo pathway*  
32 *regulator KIBRA promotes podocyte injury by inhibiting YAP signaling and*  
33 *disrupting actin cytoskeletal dynamics. J Biol Chem 292:21137–21148.*  
34 *doi:10.1074/jbc.M117.819029*
- 35 *Nakamura F, Pudas R, Heikkinen O, Permi P, Kilpeläinen I, Munday AD, Hartwig JH,*  
36 *Stossel TP, Ylännä J. 2006. The structure of the GPIb-filamin A complex.*  
37 *Blood 107:1925–1932. doi:10.1182/blood-2005-10-3964*
- 38 *Nakamura F, Song M, Hartwig JH, Stossel TP. 2014. Documentation and localization*  
39 *of force-mediated filamin A domain perturbations in moving cells. Nat*  
40 *Commun 5:4656. doi:10.1038/ncomms5656*
- 41 *Niehrs C, Acebron SP. 2012. Mitotic and mitogenic Wnt signalling. EMBO J 31:2705–*  
42 *2713. doi:10.1038/emboj.2012.124*
- 43 *Okabe M, Yamamoto K, Miyazaki Y, Motojima M, Ohtsuka M, Pastan I, Yokoo T,*  
44 *Matsusaka T. 2021. Indirect podocyte injury manifested in a partial*  
45 *podocytectomy mouse model. Am J Physiol Renal Physiol.*  
46 *doi:10.1152/ajprenal.00602.2020*
- 47 *Pavenstädt H, Kriz W, Kretzler M. 2003. Cell biology of the glomerular podocyte.*  
48 *Physiol Rev 83:253–307. doi:10.1152/physrev.00020.2002*
- 49 *Puelles VG, van der Wolde JW, Wanner N, Scheppach MW, Cullen-McEwen LA,*  
50 *Bork T, Lindenmeyer MT, Gernhold L, Wong MN, Braun F, Cohen CD, Kett*  
51 *MM, Kuppe C, Kramann R, Saritas T, van Roeyen CR, Moeller MJ, Tribolet L,*



- 1        *Rebello R, Sun YB, Li J, Müller-Newen G, Hughson MD, Hoy WE, Person F,*  
2        *Wiech T, Ricardo SD, Kerr PG, Denton KM, Furic L, Huber TB, Nikolic-*  
3        *Paterson DJ, Bertram JF. 2019. mTOR-mediated podocyte hypertrophy*  
4        *regulates glomerular integrity in mice and humans. JCI Insight* **4**.  
5        *doi:10.1172/jci.insight.99271*
- 6        *Razinia Z, Mäkelä T, Yläne J, Calderwood DA. 2012. Filamins in mechanosensing*  
7        *and signaling. Annu Rev Biophys* **41**:227–246. *doi:10.1146/annurev-biophys-*  
8        *050511-102252*
- 9        *Reiser J, Polu KR, Möller CC, Kenlan P, Altintas MM, Wei C, Faul C, Herbert S,*  
10        *Villegas I, Avila-Casado C, McGee M, Sugimoto H, Brown D, Kalluri R,*  
11        *Mundel P, Smith PL, Clapham DE, Pollak MR. 2005. TRPC6 is a glomerular*  
12        *slit diaphragm-associated channel required for normal renal function. Nat*  
13        *Genet* **37**:739–744. *doi:10.1038/ng1592*
- 14        *Schwartzman M, Reginensi A, Wong JS, Basgen JM, Meliambro K, Nicholas SB,*  
15        *D’Agati V, McNeill H, Campbell KN. 2016. Podocyte-Specific Deletion of Yes-*  
16        *Associated Protein Causes FSGS and Progressive Renal Failure. J Am Soc*  
17        *Nephrol* **27**:216–226.
- 18        *Smith MA, Hoffman LM, Beckerle MC. 2014. LIM proteins in actin cytoskeleton*  
19        *mechanoresponse. Trends Cell Biol* **24**:575–583.  
20        *doi:10.1016/j.tcb.2014.04.009*
- 21        *Sutherland-Smith AJ. 2011. Filamin structure, function and mechanics: are altered*  
22        *filamin-mediated force responses associated with human disease? Biophys*  
23        *Rev* **3**:15–23. *doi:10.1007/s12551-011-0042-y*
- 24        *Weavers H, Prieto-Sánchez S, Grawe F, García-López A, Artero R, Wilsch-*  
25        *Bräuninger M, Ruiz-Gómez M, Skaer H, Denholm B. 2009. The insect*  
26        *nephrocyte is a podocyte-like cell with a filtration slit diaphragm. Nature*  
27        **457**:322–326. *doi:10.1038/nature07526*
- 28        *Wiggins JE, Goyal M, Sanden SK, Wharram BL, Shedden KA, Misek DE, Kuick RD,*  
29        *Wiggins RC. 2005. Podocyte hypertrophy, “adaptation,” and “decompensation”*  
30        *associated with glomerular enlargement and glomerulosclerosis in the aging*  
31        *rat: prevention by calorie restriction. J Am Soc Nephrol JASN* **16**:2953–2966.  
32        *doi:10.1681/ASN.2005050488*
- 33        *Winn MP, Conlon PJ, Lynn KL, Farrington MK, Creazzo T, Hawkins AF, Daskalakis*  
34        *N, Kwan SY, Ebersviller S, Burchette JL, Pericak-Vance MA, Howell DN,*  
35        *Vance JM, Rosenberg PB. 2005. A mutation in the TRPC6 cation channel*  
36        *causes familial focal segmental glomerulosclerosis. Science* **308**:1801–1804.  
37        *doi:10.1126/science.1106215*
- 38        *Zhou A-X, Hartwig JH, Akyürek LM. 2010. Filamins in cell signaling, transcription and*  
39        *organ development. Trends Cell Biol* **20**:113–123.  
40        *doi:10.1016/j.tcb.2009.12.001*
- 41        *Zhuang S, Shao H, Guo F, Trimble R, Pearce E, Abmayr SM. 2009. Sns and Kirre,*  
42        *the Drosophila orthologs of Nephrin and Neph1, direct adhesion, fusion and*  
43        *formation of a slit diaphragm-like structure in insect nephrocytes. Dev Camb*  
44        *Engl* **136**:2335–2344. *doi:10.1242/dev.031609*
